# Supplementary material for: Modular approach to near-time data management for multi-city atmospheric environmental observation campaigns
Source: Copernicus journal article supplement (doi:10.5194/egusphere-2024-1469), 2024-06-10
Supplement: Supplementary file [file egusphere-2024-1469-RC1-supplement.pdf]

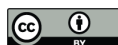

# Modular approach to near-time data management for multi-city atmospheric environmental observation campaigns

Matthias Zeeman<sup>1</sup>, Andreas Christen<sup>1</sup>, Sue Grimmond<sup>2</sup>, Daniel Fenner<sup>1</sup>, William Morrison<sup>1,2</sup>, Gregor Feigel<sup>1</sup>, Markus Sulzer<sup>1</sup>, and Nektarios Chrysoulakis<sup>3</sup>

<sup>1</sup>Albert-Ludwigs-Universität Freiburg, Environmental Meteorology, Freiburg, Germany

<sup>2</sup>University of Reading, Urban Meteorology, Reading, UK

<sup>3</sup>FORTH, Heraklion, Greece

**Correspondence:** Matthias Zeeman ([matthias.zeeman@meteo.uni-freiburg.de](mailto:matthias.zeeman@meteo.uni-freiburg.de))

**Abstract.** Urban observation networks are becoming denser, more diverse, and more mobile, while being required to provide results in near-time. The Synergy Grant *urbisphere* funded by the European Research Council (ERC) has multiple simultaneous field campaigns in cities of different sizes collecting data, for improving weather and climate models and services, including assessing the impact of cities on the atmosphere (e.g., heat, moisture, pollutant and aerosol emissions) and people's exposure to extremes (e.g., heat waves, heavy precipitation, air pollution episodes). Here, a solution to this challenge for facilitating diverse data streams, from multiple sources, scales (e.g., indoors, regional-scale atmospheric boundary layer) and cities is presented.

For model development and evaluation in heterogeneous urban environments, we need meshed networks of *in situ* observations with ground-based and airborne (remote-)sensing platforms. In this contribution we describe challenges, approaches and solutions for data management, data infrastructure, and data governance to handle the variety of data streams from primarily novel modular observation networks deployed in multiple cities, in combination with existing data collected by partners, ranging in scale from indoor sensor deployments to regional-scale boundary layer observations.

A metadata system documents: (1) sensors/instruments, (2) location and configuration of deployed components, and (3) maintenance and events. This metadata system provides the backbone for converting instrument records to calibrated, location-aware, convention-aligned and quality-assured data products, according to FAIR (Findable, Accessible, Interoperable and Reusable) principles. The data management infrastructure provides services (via, e.g., APIs, Apps, ICEs) for data inspection and subsequent calculations by campaign participants. Some near real-time distributions are made to international networks (e.g., AERONET, Phenocam) or local agencies (e.g., GovDATA) with appropriate attribution. The data documentation conventions, used to ensure structured data sets, in this case are used to improve the delivery of integrated urban services, such as to research and operational agencies, across many cities.

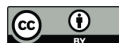

## 20 Summary

Overview of a data system for documenting, processing, managing and publishing data streams from research networks of atmospheric/environmental sensors of varying complexity in urban environments. Our solutions aim to deliver resilient, near-time data using freely-available software.

### Key Figure or Graphical Abstract

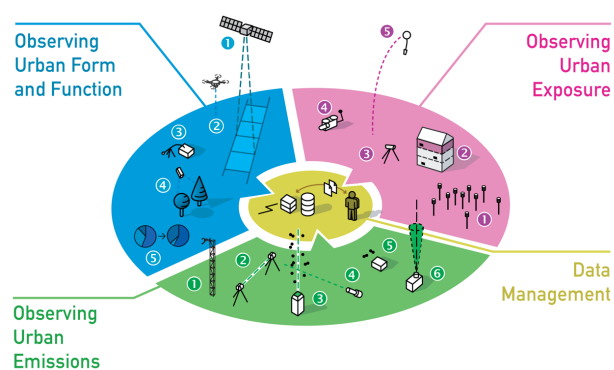

25

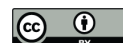

## 1 Introduction

Field observation campaigns are an essential source of information in urban environments, as long-term global climate and weather observation networks often explicitly exclude cities (Grimmond et al., 2020). Urban field campaigns differ in length providing different benefits. For example, short (approximately one year) campaigns offer a cost-effective way to explore seasonal variability in multiple urban areas by relocating instruments, whereas long-term observatories allow changes both from climate and the city itself (e.g., physical, behavioural) to be better understood. Data from both types are needed to support model development for numerical weather and climate predictions and the delivery of integrated urban services (Baklanov et al., 2018) to support current operations, plan management (Chrysoulakis et al., 2023), and adaptation of cities into the future. Such observation campaigns require robust, structured data management. Unlike operational regulatory networks (e.g., air quality), campaigns have limited duration, often employ novel measurement systems often prior to open-source or commercial data management solutions existing.

Urban environments pose challenges because of multiple scales of interest (indoors to city-wide), intra-city and intercity diversity at most scales (e.g., room uses, building types, neighbourhoods), people's activities (e.g., needing to continue undisturbed but impacts observed), and all compounded by city size (Landsberg, 1970; Oke, 2005; Grimmond, 2005; Muller et al., 2013b; WMO, 2019; Yang and Bou-Zeid, 2019; Masson et al., 2020; Grimmond et al., 2020). Existing long-term sensors, enhanced for campaign objectives and applications (e.g., human health, energy infrastructure) allow urban surface-atmosphere dynamics to be captured. However, the multitude of city layouts, topographic settings, and regional climates means there is not one solution to combining field observations, remote sensing and modelling in urban areas. Rather there is need to address this at multiple scales simultaneously, in multiple cities with duplication of combinations to ensure the general pattern is correctly identified (Barlow et al., 2017; Pardyjak and Stoll, 2017; WMO, 2021) in comparisons. Hence, concurrent sensor deployments, mounted on static and mobile platforms, located indoors and outdoors, measuring micro- to mesoscale processes over different length of periods will need to occur.

Research campaigns by definition deviate from operational deployments (e.g., WMO's National Meteorological and Hydrological Services). Urban campaigns have a long tradition of multiple groups combining resources to focus on a city or a specific aspect of the urban environment (e.g., Changnon et al., 1971; Rotach et al., 2005; Allwine et al., 2004; Mestayer et al., 2005; Wood et al., 2013; Bohnenstengel et al., 2015; Scherer et al., 2019; Karl et al., 2020; Caluwaerts et al., 2021; Fenner et al., 2024b), making the homogeneous single-sensor-model network, operated by multiple collaborating partners using identical operating protocols (e.g., same objectives, calibration procedures) unlikely (Scherer et al., 2019; Caluwaerts et al., 2021; Marquès et al., 2022). Although sensors designed for the same observation type may be similar, they are rarely fully interchangeable (de Vos et al., 2020). However, intentionally heterogeneous sensor model networks (e.g., low-cost and high-grade instruments) may complement each-other (Jha et al., 2015; Gubler et al., 2021).

Data collection by a single project in one city should produce comparable data to that collected in other cities, or a later campaign in the same city, to support comparative and longitudinal studies. The large data sets need to be easily ingestible into



model evaluation studies, today and in the future, requiring structured data, attributed metadata, following conventions and standards.

Short-term urban field observation campaigns are highly dynamic (Yang and Bou-Zeid, 2019), capturing processes of interest and responding to near real-time results allowing plans to evolve. This makes assessments time-sensitive, diagnosing network operational status critical, to inform models, to make decisions on resource-intensive field deployments (e.g. radiosoundings, tracer releases), and to make dynamic adjustments to network design (Changnon et al., 1971; Rotach et al., 2005). Data management for rapid discovery needs to be both technically and organisationally structured, posing additional challenges (Wilkinson et al., 2016; Middel et al., 2022). In a research community, sharing near real-time data internally and publicly is increasingly expected, as data, software code and products (results) are co-produced. Thus, output becomes “Living Data” given continuous sharing, even before all required metadata are available (Oke, 2005; Stewart, 2011; Muller et al., 2013a; WMO, 2023) including attribution, documentation in peer-reviewed papers, or full scientific scrutiny. However, rapid availability does not remove scientific obligations (e.g., peer-reviewed publications with careful scientific assessment, attribution to researchers, institutions, funding agencies).

Here, we present an approach developed within the European Research Council (ERC) Synergy Grant *urbisphere*. *urbisphere* addresses dynamic feedback between weather, climate and cities through synergistic activities between four disciplines (spatial planning, air- and spaceborne observations, modelling, and ground-based observations). The project involves quantifying aspects of the influence of urban emissions on the atmospheric boundary layer above and downwind of cities; and human exposure in urban environments (e.g., streets, indoors) that vary across a city and with time as both form and function change.

Central to *urbisphere* are both concurrent and consecutive campaigns in multiple cities undertaken in different countries, using a modular observation system. Observations are needed to support empirical assessments and studies, model development and model evaluation. Activities are structured into four Modules (A to D, Figure 1). Module A gathers data on urban form (e.g., morphology, materials) and function (e.g., people’s mobility patterns, vegetation phenology), which varies in space and over time. Data from surveys, official sources, imagers and spaceborne sensors are used for geographically and temporally assessing form and function and to derive inputs to models. Module B quantifies how urban form and function affect the urban atmosphere over and downwind of cities through emissions of heat, pollutants, and aerosols and how cities modify the dynamic and thermodynamic state of the overlying atmospheric boundary layer. In Module C, we quantify differential exposure of people in and between cities (e.g., to heat, flooding). The different objectives in Module A to C require targeted and specific observational strategies, but all require consistent data management, documentation and quality control processes. (Module D).

Here we present the integrating data management and infrastructure system (Module D) developed to support the observational sensors and systems in modules A to C (Figure 1). We are excluding spaceborne observations, data from long-term partner data networks (e.g. meteorological agencies and services), and surveys and administrative data as there are existing data management platforms and systems available. Instead we focus on atmospheric and environmental sensing systems in Modules A to C that are deployed during campaigns. The observational sensors and systems deployed in Modules A to C are diverse (Figure 1), quantifying many variables, and are operated in diverse settings (e.g., street-light posts, building roof-tops, indoors) as well as on mobile platforms (e.g., vehicles, balloons, drones). Hence, there are fixed deployments and mobile mea-

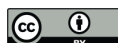

surements, sensors with multiple uses, need for near real-time data e.g., during intensive observation periods (IOPs), changing configurations, deployments of varying duration (e.g., hours, days, months, years). This is managed by multiple people with different responsibilities, roles and backgrounds.

The system currently ingests the order of  $10^9$  datapoints per day from about 100+ different stations and approximately 1000 sensors in five different cities. Using automated processes, data are delivered in near-time (minutes to hours) to central data infrastructure through mobile phone and Internet of Things connectivity. We showcase the technical and organizational solutions to creating a modular data management system, considering: documentation, acquisition, products, governance, standardisation, reuse and sharing.

## 2 Data documentation

As data documentation during observation campaigns occurs at pre-, during and post-deployment, it is critical to have a structure early for capturing all details (e.g., Table 1), especially at busy, time-limited periods. As part of sensor installation preparation, data to describe a site and sensor-system details need to be captured, as they are essential metadata for processing the datastream. Standard conventions facilitate data (re)use, enhancing data value both to the general community and the project (Muller et al., 2013a; WMO, 2021). Critical to this, is it being accessible to team members during a campaign and subsequently as data are processed (Figure 2).

### 2.1 Metadata

As field observations involve multiple networks (Table 1), metadata are essential to organizing the data collection (e.g., files, directories), and as the audit trail of modifications. The physical, logical, and organisational context of the field observations are defined early in the data management process (Table 1) because of the latter, from planning to collection to publication. Once data collection begins, the production chain needs to systematically encode attributes (e.g., location) into a series of searchable databases (DBs; Figure 3).

The *Inventory DB* has all instruments used in the campaigns with links to the maintenance and organisation details (e.g., owners of different parts of a deployment, Figure 3). The inventory DB holds the primary calibration, purchasing, maintenance and software (firmware) history and availability of each instrument. Examples of the operational relational queries, using a graphical user interface (GUI), include finding: if an identical instrument exists in storage or another deployment; all instruments at a location; all mobile-phone SIM cards linked to a data plan; all calibration sheets for a given sensor, and warranty documents to facilitate sending an instrument back to a manufacturer for service. The inventory GUI offers dialogue in multiple languages, facilitating international cooperative use by all staff and incorporates direct access to all instrument manuals.

The *Deployment DB* (Figure 3) has instrument's configuration, including location and relation to other instruments during a deployment, as well as organisation details. This is the primary record of instrument operational status at any time. The *Deployment DB* GUI allows entries to be added or modified. Most instruments are in a hierarchical relation, such as being a "child" connected a "parent" (e.g., internet-attached data logger connected to an instrument). A two-level parent-child hierarchy



has instruments on a local network node with a local storage node referred to as a “system” (Table 1 and 2). For the *Deployment DB* consistency, instruments with integrated data recording and autonomous network capabilities are both a “system” and a “sensor”.

The hierarchy of spatial information for a “station” (or “site”) is from geographic coordinates, to a local Cartesian or polar coordinate system (Figure A3) to explain details in a complex setting such as a roof (Figure A1) or within a building (Figure A2). The database relationships allow identical sensor replacement (e.g., AWS), without needing to modify any of this spatial information. Typically, a duplicate configuration is modified to capture the changes occurring for a period. Given numerous complementary data sources, including space- and airborne (e.g., satellites, drone, aircraft sensors), city GIS, and models (e.g., source areas, numerical weather prediction model output), it is critical that metadata are precisely geo-located and time-stamped. In the deployment DB, start and end time identify the operational periods (Figure 4).

The *Events DB* (Figure 3) captures the field and laboratory notes, normally linked to events, such as on-site maintenance visits, relevant near site changes, remotely identified anomalies, and instrument disturbances (e.g. dirt on sensors). All field visits, instrument malfunctions, disturbances, anomalous weather, unexpected patterns in observed data, and brief datastream outages need to be documented as “events” at the time, and may require subsequent actions. Complete documentation should provide a traceable audit trail of all intended and unexpected conditions related to an observed variable and, to facilitate subsequent data interpretation, measurement and photos of the location, orientation, direction of view and relative position to obstacles, attributed with a timestamp. This information is vital to identifying and explaining unexpected changes or anomalous data. The collected event notes, after evaluation, if needed, are converted into *Deployment DB* entries. Most events are not recorded in the *Events DB* in real-time, because of varied paths, sources requiring decisions about the data consequences, and its appropriate use (Figure 5). Data stream quality control (QC) includes automated assessment of typical meteorological variables (e.g., air temperature, humidity, wind speed, wind direction, pressure, precipitation intensity), following e.g., VDI (VDI 2013, Figure 6 and Figure 7). Event detection can include spatial statistics, but this is not operationally implemented.

## 2.2 Conventions

Building on existing data conventions and standards can enhance data usage. In *urbisphere*, we use the climate and forecast (CF) metadata conventions (cf-conventions-1.10, or CF hereafter; see Hassell et al., 2017) API for NetCDF, with extensions often used in the urban research community (Scherer et al., 2019) and consistent with prior campaigns, model applications, third-party software tools, common with the campaign’s instruments and project-specific production needs.

Most of the production chain in *urbisphere* is based on NetCDF database files. To maximise portability, only features commonly implemented in the various software libraries and platforms are used. A set of unique identifiers creates a relational chain between locations, instruments, events, variables and variable units, and therefore the data recorded and publishable data products. To facilitate this, instruments and data are organised into functional groups (Figure 1, Table 3; see also Appendix B).

Many instruments and data recorders encode sensor data records to proprietary formats, which based on user options may provide calibrated and aggregated data records with sensor diagnostics. To simplify later inquiries, a best practise for output file formats, metadata attributes and file name patterns for each instrument model or instrument group (see, e.g., Appendix B) is



160 adopted. Where possible, identifiers are included as headers in instrument data files, directory names and/or file names. These practises allow programmatic extraction of key identifiers from file names, data and metadata databases with few exceptions. Particularly for observation systems that used APIs for the retrieval of data, a consistent use of identifiers is an essential operational aspect (Feigel et al., in review).

### 2.2.1 Vocabulary

165 CF forms a robust framework for data and metadata, but does not formally include all variables needed in urban areas (Grimmond et al., 2010; Scherer et al., 2019, 2022; WMO, 2021; Lipson et al., 2022), so extensions are made building on earlier projects that will need further review to be formally brought into the CF (Hassell et al., 2017). The shared vocabulary facilitates efficient queries and multiple benefits. The CF conventions defines vocabulary for dimensions and units for many variables, as well as attributes to assure data provenance (Hassell et al., 2017). Existing community software tools work with NetCDF  
170 and CF-related vocabulary definitions, including modules to perform programmatic conversion of units of quantities (e.g., the UDUNITS module; Hassell et al., 2017).

### 2.2.2 Outdoor deployment

Site selections in urban deployments depend on research questions, measured variables, and scales of interest (WMO, 2006; Oke, 2017). Measurement of, e.g., near-surface air temperature in an urban area may require different siting requirements than  
175 standard WMO regional scale weather, with neither satisfying the other (Stewart, 2011; WMO, 2023).

Most deployments are at fixed locations, but as surroundings change, regular review of deployment configurations are required, and therefore metadata adjustments. Some instruments have accurate clocks and sensors to self-determine location and orientation, providing metadata details (e.g., radio-sounding sensors). Other deployments may require frequent offsets to be determined or determined continuously relative to a (local) reference. Site documentation requires consistent use of coordinate  
180 reference systems, considering various aspects of urban landscapes and linkable to other sources (e.g., city GIS systems derived from detailed airborne lidars, numerical models) (Appendix A; Figure A1). Local reference points are needed for all observations to be linked to other (e.g. geospatial) datasets. Some stations are located on surfaces (e.g., roofs) that may not coincide with the deployed platforms or instruments. However, using a representative surface coordinate set (Figure A1b), instead of exact system location ((Figure A1a; Figure A2), simplifies immediate reuse of coordinates between sources. Furthermore,  
185 some sensor views may not provide usable data for some research objectives, requiring detailed understanding of a site (e.g., glass or shaded areas for thermal imagery; orientation of a roof edge for momentum flux; three-dimensional scan patterns for Doppler wind-lidar). All systems have GPS time or internet reference time services, and all data during *urbisphere* campaigns are generally recorded in UTC (Appendix A1).





### 2.2.3 Indoor deployment

190 Sensors deployed indoors have multiple purposes including assessing: human exposure (Sulzer et al., 2022), building energy models (Liu et al., 2023), and influences of the indoor micro-climate extremes on human and animal stress (Walikewitz et al., 2015; Marquès et al., 2022; Sulzer et al., 2023), so require many site details. A classification is implemented that includes characteristics and orientation of the building, room, walls, windows, content of the room, space usage type, occupancy, and other factors affecting the indoor climate and human comfort of workers or residents (Appendix A; Figure A2). Whereas basic  
195 meteorological observations are recommended to be free of obstacles and heterogeneous influences, indoor observations are, in summary, an opposite. Siting for all sensors need to be representative of what people and room are likely to experience, while still allowing the rooms to be used in its intended way.

### 2.3 Operational management

Conversations about planning, issues and resolutions are an essential part of a campaign's knowledge base. To make commu-  
200 nication related to the deployments accessible for discovery by data users, from any location and at any time, each campaign maintains a repository for issue tracking, source code development and wiki-type documentation (GitHub, GitHub Inc, San Francisco, CA, USA). Similar repositories help maintain overarching subjects, such as data management. Other repositories are maintained on enterprise cloud data storage (Dropbox, Dropbox International Unlimited Company, Dublin, Ireland), to store and share auxiliary data files, such as photos, protocols and calibration records, organised by campaign, location, and time.  
205 Additionally, customised forms and shareable spreadsheets are accessible using online services (Google Forms and Google Sheets, Google Ireland Limited, Dublin, Ireland), to gather provisional metadata.

The core database systems, including the inventory and deployment configuration DBs (Figure 3), are designed using open source web-, database- and user-interface tools (the so-called LEMP stack; Linux, Nginx, MariaDB, PHP) and application frameworks (Appendix C3).

## 210 3 Data acquisition and products

A “data source” may be a sensor, a network node or an organisational unit (Table 1), with different contexts that need to be retained and clearly identifiable. Typically, a chain of systems and responsibilities are involved, with multiple actors, nodes and locations (Table 1; Table 3; Figure 5). The source needs to be defined and preserved in order to ensure data governance agreements, accessibility, responsibilities and effectively respond to issues that occur. For example, if an instrument at a par-  
215 ticular location is not responding, the data and metadata must allow the relevant infrastructure, the responsible people and the production line processes to be looked up efficiently (Figure 2) for that particular location. Key features of the physical and logical networks (Section 3) are presented to organisational aspects (Section 4).





### 3.1 Data infrastructure

The data infrastructure combines the interest of data safe-keeping with data accessibility (Figure 8). Keeping data secure is a primary project deliverable and involves basic protection against unknown malicious actors and protection against accidental data loss. Within the data architecture, a central operational archive is maintained on a suitably large storage volume (larger than 50 Tb logical volumes on RAID storage units). A replica of the data is maintained on an identical storage unit in a different building (geo-redundant backup), with additional daily backups on enterprise storage services (on and off campus). The data infrastructure uses virtualised computing hardware. Virtualization makes it possible to isolate critical functions without the need to expand physical hardware, and allows the data infrastructure to scale dynamically as needed. The critical functions include a remote access node for all uploads from local field stations (“gateway”), a remote access node for metadata databases and related web-interfaces (“status”), a remote storage node for archival of data and public access nodes (“workstations”) for monitoring, computations and user access to data (Figure 8).

### 3.2 Access

The original data and metadata are kept on different physical servers. However, users with access to a workstation are provided with immediate access to a read-only view of the original data, as well as a read-only replica of the metadata DBs. Access to data and metadata is read-only by default, primarily to minimize the risk of accidental data loss. This in turn removes the need for strict user access guidelines on the public access node workstations, allowing a more liberal use of the workstation resources. Workstations are used as public access nodes, with a wide selection of services available at the user-level, including Application Programming Interfaces (APIs), Integrated Computing Interfaces (ICEs) and other interactive websites (Apps) for users and the public (see also Appendix C).

However, adding new files to the archive, or modifying files on the archive, is more involved, and requires new or renewed upload. The uploaded data are managed by data managers, using separate accounts for the upload and data management. Users and groups are managed on a file system level and the credentials are maintained in encrypted key chains for each campaign. The need for administrator privileges is avoided, where possible, and the directory access for accounts used in automation (e.g., FTP credentials are transmitted as text) is restricted in scope. Write access to the remote storage node is restricted by default and limited in scope. Typically, data are uploaded automatically by an instrument, or manually by a user, onto intermediate storage locations on the remote storage node (“upload server”; see Figure 8). Typically, uploads are synchronised immediately to dedicated locations on the archive. The synchronisation uses individual configurations for each of the upload locations, which can be activated or deactivated if needed. Data management accounts are restricted in access scope to the relevant locations on the archive, set by file system permissions of the intermediate storage source and the destination location on the remote storage node. The design allows multiple campaigns to be operated at the same time without cross-interference, and facilitates the transition in instrument deployment from one campaign to the next by either replacement of the user credentials for data upload on the local network node in the field or by re-configuring the redirection destinations on the remote access node. Such a transition between campaigns is helpful, as it allows the write access to original data locations to be revoked by a



data manager after completion of one campaign, without the need to modify the individual file attributes of a complex subset of millions of files in file locations shared with subsequent campaigns.

### 3.3 Sources

Instrument groups are based on characteristic instrument features (Table 3). The three-character identifier is sufficient to prevent ambiguity.

Data are stored in the instrument-provided formats, which may be custom text records (encoded information in a proprietary format, e.g., TOA5, or a defined schema, e.g., XML), where new records are appended as lines to a file with a header that contains metadata and a column description. However, we have a preference for standardised delimited text files (e.g., comma separated values) to simplify archival. Binary format files are used only where no text-based alternative exists. Binary formats are introduced where encoding is necessary to save storage space and bandwidth, including image formats for grid data and NetCDF format for trajectory data (Table 3). The data files contain collections of up to daily periods, except for the few cases with single timestamp observations stored in separate files.

### 3.4 Transmission

Network connections for temporarily deployed instruments need to be flexible and modular. As a research network, temporary and long-term network outages must be accounted for in the design, requiring sufficient local data storage on or near the instrument, as well as methods to resume data transmission after an outage. Although there are no substantial differences between text and binary data storage, the transfer of binary data requires extra caution. File corruption from an incompletely transferred binary file makes data inaccessible, whereas incomplete text files can mostly be read and processed. In both cases, it is critical to assure transfer of an identical copy from the local instrument to the remote archive.

As a logical network, the local storage node and local access node have an important role in transmission of data (Table 2). The local storage and local access node are combined, where possible, by selecting instruments with autonomous mobile phone network capabilities (NB-IoT network type) or by connecting an instrument directly to: an existing station network (wired or 4G LTE network type), a mobile phone network router (4G LTE network type) or a more capable instrument within the shared local network (see e.g., Raspberry PI model 4 based data logging; Feigel et al., in review). Those capabilities include having redundancy in data storage, network access and data transfer services (e.g., desktop access, file access) and housekeeping software. These capabilities typically help remedy limitations arising from any legacy operating systems and outdated firmware of instruments.

The logical network uses industry-standard protocols for the transmission of data files (i.e., FTP, SFTP and RSYNC through SSH). SFTP adds a secure authentication and encryption layer to the transfer (cf. FTP), whereas RSYNC adds incremental, compressed and validated data transfer (cf. SFTP). RSYNC is preferred, as it allows reliable recovery of incomplete or failed transfers with limited bandwidth overhead on the logical network. Custom software is used to configure the RSYNC client software and set retention periods for data transmission (Morrison, 2022). The synchronisation of data between storage locations also relies on RSYNC (i.e., as transport method for Lsyncd). We find the FTP protocol is no longer fully supported by



all mobile phone network carriers. As some data loggers (e.g., model CR1000X, Campbell Scientific, Logan, Utah, USA) use  
285 alternative protocols, the upload server is configured to allow legacy authentication methods for SFTP connection. The flexi-  
bility to make such server-side adjustment to the configuration underpins why ad-hoc research data collection benefits from a  
dedicated, custom data infrastructure (Figure 9).

A limitation of the current internet infrastructure is that an assigned network address cannot be reached from outside a private  
or mobile network without a Virtual Private Network (VPN). By default, the data transfer can only be initiated from the local  
290 access node to the remote storage node. VPN is available through some routers (e.g., model RUT240 and Teltonika services,  
Teltonika Network, Kaunas, Lithuania), or commercial remote desktop software (e.g., AnyDesk Software GmbH, Stuttgart,  
Germany). On occasions, both remote access solutions are used to diagnose issues, transfer miscellaneous files or reconfigure  
instruments from a remote office location.

### 3.5 Production levels

295 Participants and data systems produce many data set and services. Most intermediate results are shared immediately and  
automatically for different uses. Production processes have production levels (some optional) to help keep track of data from  
collection to publication, as follows (Figure 10):

- RAW: Data recorded by instruments, from multiple sources (e.g., campaign-deployed sensors, partners, third-party APIs).
- L0 (optional): Transcribed RAW data (i.e., to binary) with metadata attributes and typically aggregated to daily or  
300 monthly periods. This structured alternative to RAW data is intended to speed up data ingestion for subsequent data  
processing tasks, with variable vocabulary identical to the RAW input files.
- L1 (optional): Curated data sets, with various processing (e.g., quality control, coordinate alignments, metadata stan-  
dardization, translation of names and units according to conventions) but remaining penultimate to L2.
- L2: Published or publication-ready data sets. Metadata attributes, as its absolute minimum, include title, source, key-  
305 words, references, authors, contributors, license, comments, history and creation time.

The production levels are collaboratively managed. L0 products are typically scheduled automated routines (e.g., Figure 10,  
Figure 11, Figure 2), with timing adjusted to recover if brief (2 - 28 h) data transmission delays occur between a local instrument  
source and the remote destination (Figure 5). Beyond this, further interaction is needed (Appendix A1). L0 data are shared as  
input for diagnostics and other near real-time analyses. Data products and intermediate results follow naming conventions  
310 given in Appendix B.

### 3.6 Services

Web-based interactive computing environments (ICE) on workstations with common libraries and replicate environments are to  
develop code with immediate access to the data archive. The intent of this centrally-managed ICE is to reduce interoperability



issues arising between libraries and versions from individually-maintained code environments. The common ICE has Python  
315 and R interfaces (JupyterLab), is modified upon request and documented (i.e., a GitHub repository) and if needed, users can  
built and use their own ICE (Appendix C2, Figure C1).

Visualisation of data is implemented into internet-accessible applications (Apps), developed and deployed by researchers  
using ICEs. The main evaluation of data processes, operational status and availability relies on “quick-look” figures, automat-  
ically generated from RAW/L0/L1 data. These are integrated into interactive Apps, or dashboards (Appendix C; notably C3).

320 Data flows are monitored with respect to recorded data files and data within. A software tool monitors system status, resource  
monitoring and alerts (“watchdog”) using the NAGIOS protocol and tools.

Application programming interfaces can enhance data access by providing dedicating handling of communication between  
computer programs and are used for many tasks. For some instrument subgroups, APIs are the main point of access to recorded  
data (e.g., a street-level automatic weather stations network, Figure C1). In turn, we provide access to curated data in near  
325 real-time to researchers and partners using APIs (Appendix C4). The ZENODO research data repository API helps simplify  
automated data management tasks for publication of data (European Organization For Nuclear Research and OpenAIRE, 2013;  
Rettberg, 2018). The APIs use REST methods for communication (Appendix C4).

### 3.7 Operational Costs

To help keep operating costs low, logical network design, careful configuration of data transfer tools and automation are used.  
330 Semi-automated, central data collection allows multiple people to monitor instrument and network output in near real-time.  
The efficiency of incremental, compressed data transfer reduces data transfer volumes, allowing many systems (stations) to  
share one mobile phone data plan. User-level automation on local storage nodes (e.g., scheduled data transfer, local data  
housekeeping and data transfer recovery after outages) reduce interference of running systems during maintenance (e.g., onsite  
swapping storage cards). User-level automation on remote access node and public access nodes, allow campaign data managers  
335 to control their data flow and allow multiple users to develop solutions for data monitoring, data exploration and computation,  
independently.

The benefits of near real-time data access and cost savings must be weighed against costs (e.g., mobile phone network  
routers, data subscriptions, development time). Other operational costs involve the servers (e.g. configuration, maintenance of  
local and remote access nodes), storage (e.g. remote nodes, redundant backup systems) and public access node workstations.  
340 Typically, local access nodes are not modified during a campaign, so require rigorous testing prior to deployment (Feigel et al.,  
in review). For our system, the remote access, storage and metadata database nodes consisting of ten servers using Windows,  
Linux and OSX operating systems. All requiring frequent security updates to comply with institutional requirements and  
industry practise. Virtualization hardware, additional backup systems and encryption certificates are provided institutionally.  
This data infrastructure can be expanded as required from multiple, concurrent campaigns and projects.

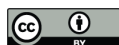

#### 345 4 Data governance

Most campaigns use data streams from partners instrumentation either directly or more typically from their data networks (e.g., Weather Service), or from third-party networks they contribute to (e.g., AERONET, Phenocam Network, ICOS, PANAME) (Giles et al., 2019; Richard et al., 2018; Haeffelin et al., 2023). Many of the latter are two-way contributions with campaign sensors also providing data to these networks. Data management is facilitated by assignment of roles and responsibilities. The  
350 roles are commonly shared or combined. Examples of different type of roles of users of the system include (Figure 2, Figure 5, Figure 9, Figure 10, Table A2).

- *Principal Investigator*: executive responsibility for all scientific activities, campaigns, data and peer-reviewed publications and priorities;
- *Campaign Manager*: lead for all aspects of a particular campaign (city);
- 355 – *Data Manager*: lead for data infrastructure supporting campaign teams;
- *Publication Manager*: responsible for a data publication process;
- *Researcher*: responsible for a particular data production line or instrument group;
- *Field Operator*: responsible for deployment and maintenance.

Many people undertake data manager and researcher roles, with most at the end having a responsibility for publishing data.

360 Data governance needs to recognize the multiple participating members (e.g., campaign teams, project partners, land owners, external data providers and data users), their interests (e.g., contribution to outputs, liability limitations, expenses, funding agencies) and to provide open data using FAIR principles (i.e., findable, accessible, interoperable and reusable; Hassell et al., 2017). Thus, data governance covers (Figure 12):

- 365 – *Formal agreements* for deploying instruments on a property or institutional platform (e.g., lattice mast) or location (e.g., observatory).
- *Grant agreements* (e.g., *urbisphere* Data Management Policy) covering data ownership and grant compliance laws (e.g., European GDPR (General Data Protection Regulation 2016/679), FAIR, data security and data retention).
- L2 data are releases with a *license* (e.g., Creative Commons Attribution 4.0 International; CC BY 4.0) with terms of use adjusted in compliance with the license (Brettschneider et al., 2021). Various notices are included, e.g., license, creator, copyright, attribution, materials, disclaimer notice and citation. The license notice is a machine readable reference to  
370 the license, including a link or URI to the full license text. The creator notice states the data authorship. The attribution notice includes a template to address attribution parties, e.g., to credit the primary funding agency. The disclaimer notice involves legal text regarding the limitation of liability and warranty. The material notice describes exactly what part of the work is covered by the licence, such as data records, images and text, but not the NetCDF database structure. Prior  
375 to release, the license and creator notice will not be included and a copyright notice is used instead (Table 6).



The data management agreements set requirements on how data will be stored and accessed, which must be communicated and made understandable to the individuals and associations involved (Figure 13), regardless of their role in the organisation of a campaign (Figure 2, Table 1).

## 5 Conclusions

380 A resilient modular monitoring system for urban environments has been developed to allow rapid new deployments with changes in infrastructure and network technology with a diverse set of field instruments being deployed during observation campaigns. The implementation primarily uses: **freely-available software tools**, established services for storing research data, and community adopted conventions.

385 The system has to date been employed in several cities and different countries simultaneously. Our use cases not only involve research data products but also urban hydrometeorological services that reach the users – government officials, modeling teams and the public – in near real-time through the implementation of FAIR principles.

*Code and data availability.* Datasets are available through the Zenodo community *urbisphere* (zen, 2021).

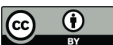

List of Tables

|    |                                                                                                                                                                                                                                                                                                                                                                                   |    |
|----|-----------------------------------------------------------------------------------------------------------------------------------------------------------------------------------------------------------------------------------------------------------------------------------------------------------------------------------------------------------------------------------|----|
| 1  | Deployments involve both a physical network of infrastructure at distributed locations, and a logical network, involving different organisations who have various roles. An example of a typical deployment configuration of a sensor is shown (shaded). . . . .                                                                                                                  | 18 |
| 2  | Observational network data are organised using a limited set of dimensions, (typically) retrieved from the data itself and their associated metadata. Ingested data (RAW) are completed across the multi-dimensional data stores at level 0 (L0). Although metadata are essential for data analysis, they are not repeated at all levels (L) to improve interoperability. . . . . | 19 |
| 3  | Instruments are classified into functional groups with sensors measuring at a point, along a path, or pixel area. Many instruments have dynamic source areas either because of meteorological conditions or if the sensor is mounted on a mobile platform. . . . .                                                                                                                | 20 |
| 4  | Example production lines used in the data management system. . . . .                                                                                                                                                                                                                                                                                                              | 21 |
| 5  | Glossary. . . . .                                                                                                                                                                                                                                                                                                                                                                 | 23 |
| 6  | Notices (e.g., disclaimers) accompanying data publications in the <i>urbisphere</i> project. Data published in near-time have additional text (bold). Author list is updated at publication with an open licence. . . . .                                                                                                                                                         | 25 |
| A1 | Coordinate attributes and the relationship between coordinate reference systems (i.e., station, using global CRS and VRS references; system, sensor, channel using local references) and metadata (i.e., conventions, standards, definitions, units). . . . .                                                                                                                     | 40 |
| A2 | Coordinate attributes and their meaning for metadata that are required, partially required or required but set with a default value. . . . .                                                                                                                                                                                                                                      | 42 |
| B1 | Naming convention for different types by production level with patterns and attributes. . . . .                                                                                                                                                                                                                                                                                   | 49 |



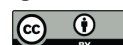

## List of Figures

|     |    |                                                                                                                                                                                                                                                                                                                                                                                                                                                     |    |
|-----|----|-----------------------------------------------------------------------------------------------------------------------------------------------------------------------------------------------------------------------------------------------------------------------------------------------------------------------------------------------------------------------------------------------------------------------------------------------------|----|
| 410 | 1  | Conceptual diagram of the modular observation system operated in the <i>urbisphere</i> project. Modules A to C collect observational data in different cities, Module D integrates them in the unified data management approach.                                                                                                                                                                                                                    | 26 |
|     | 2  | Operational connections are entwined between the physical and logical networks and the organisations. . . . .                                                                                                                                                                                                                                                                                                                                       | 27 |
|     | 3  | Conceptual overview of databases (DBs) that form the metadata, and the primary attributes that connect the DBs.                                                                                                                                                                                                                                                                                                                                     | 28 |
|     | 4  | Example of data (air temperature) through time per station deployed (Freiburg, Germany): (upper) pre- and                                                                                                                                                                                                                                                                                                                                           |    |
| 415 |    | (lower) post-metadata application for masking invalid data. In this case, the instruments (autonomous Auto-                                                                                                                                                                                                                                                                                                                                         |    |
|     |    | matic Weather Stations) report data if powered, so metadata are needed to define operational deployment periods.                                                                                                                                                                                                                                                                                                                                    | 29 |
|     | 5  | Conceptual timeline (days, D) before and after an event is raised and resolved, with different examples of when and who are involved, including two automated methods (M1, M2). . . . .                                                                                                                                                                                                                                                             | 30 |
|     | 6  | Example of automatic quality control for AWS air temperature ( <i>ta</i> , bottom panel) data to illustrate VDI 3786                                                                                                                                                                                                                                                                                                                                |    |
| 420 |    | (VDI, 2013) quality control indicators (vertical lines = bad quality, top panel). . . . .                                                                                                                                                                                                                                                                                                                                                           | 31 |
|     | 7  | VDI 3786 (VDI, 2013) quality control indicators applied to the Freiburg AWS network (rows) during a storm (11 to 12 Jul 2023) for all variables (precipitation <i>pr_rate</i> ; air temperature <i>ta</i> ; relative humidity <i>hur</i> ; wind speed <i>ws</i> ; wind direction <i>wd</i> ; station pressure <i>plev</i> ; incoming short wave (or global) radiation <i>rds</i> ) with quality flags shown: long = “bad”, short = missing. . . . . | 32 |
| 425 | 8  | Access to data is needed from both public and private domains, using private data infrastructure. Archived data and metadata are read-only accessible (dashed lines, light colors) for shared production (L0, L1, L2), which is redirected to the archive and interfaces for public access and other uses. DB: Database . . . . .                                                                                                                   | 33 |
|     | 9  | Example of a data-stream from multiple networks and various databases (DBs), with the applications used in the production steps and the data store formats (bottom row) using scheduled scripts. The typical data stream                                                                                                                                                                                                                            |    |
| 430 |    | is from local instruments to a remote server that provides public access. . . . .                                                                                                                                                                                                                                                                                                                                                                   | 34 |
|     | 10 | Pathways of data (from RAW to intermediate (L0, L1) and publication (L2)) with archiving at multiple stages. Data are shared (dark) and replicated (light). . . . .                                                                                                                                                                                                                                                                                 | 35 |
|     | 11 | An example of a production line, the various databases (DBs) and applications used in the production steps and the (bottom) data formats for data products for multiple uses. Scheduled scripts generate configurations that                                                                                                                                                                                                                        |    |
| 435 |    | actuate the production line code during automation. . . . .                                                                                                                                                                                                                                                                                                                                                                                         | 36 |
|     | 12 | Pathways to making data publications public accessible require the different data governance issues to be formalized early, allowing access to be rapid after any restrictions. . . . .                                                                                                                                                                                                                                                             | 37 |
|     | 13 | An info-graphics using a switchboard analogy is used to communicate where data is uploaded, where data can be downloaded and where data streams are being managed or modified. . . . .                                                                                                                                                                                                                                                              | 38 |
| 440 | A1 | Deployment on a building roof with the relations between (a) a local station, platform, instrument, recorded image and related coordinate systems in polar and Cartesian coordinates, and (b) local and global coordinate reference systems as well as features in ordinance inventory and Earth Observation. . . . .                                                                                                                               | 43 |

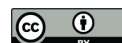

|     |    |                                                                                                                         |    |
|-----|----|-------------------------------------------------------------------------------------------------------------------------|----|
|     | A2 | Indoor measurements of ambient temperature require uniquely different metadata, compared to classical out-              |    |
|     |    | door measurements, including additional coordinates for the orientation and features of the building, the room,         |    |
| 445 |    | the walls and the adjacent space, as well as of objects that generate, transmit, transport or intercept radiative heat. | 44 |
|     | A3 | Metadata definitions for the relationships between platforms and instruments, and their coordinate systems. . . .       | 45 |
|     | A4 | Production schedule includes batch routines, sub-hourly and daily overlapping routines to recover data if short-        |    |
|     |    | term interruptions in networks occur (e.g., within last 48 h). . . . .                                                  | 47 |
|     | C1 | An example of web browser data science environment and ICE (JupyterLab) with simple code inspecting data.               | 52 |
| 450 | C2 | As Fig. C3 but, of most recently changed files and folders by campaign (e.g., city). . . . .                            | 53 |
|     | C3 | Dashboard App used to visualise most recent data for inspection. . . . .                                                | 54 |
|     | C4 | Example overview of available data as time against time of day, includes metadata attributes to help identify           |    |
|     |    | attribution, location context, production information and a time line of events as known at time of creation. . . .     | 55 |
|     | C5 | Near-time Doppler Wind Lidar (DWL) data used for diagnostics and data exploration. . . . .                              | 56 |
| 455 | C6 | As Fig. C5, but for Automatic Lidar and Ceilometer (ALC) . . . . .                                                      | 57 |
|     | C7 | An example of (a) an AWS product summary (b) a data API and (c) the uniWeather Phone App (Feigel et al.,                |    |
|     |    | in review) that use the same (meta-)data dynamically. . . . .                                                           | 58 |



**Table 1.** Deployments involve both a physical network of infrastructure at distributed locations, and a logical network, involving different organisations who have various roles. An example of a typical deployment configuration of a sensor is shown (shaded).

| Physical Network         | Logical Network     | Organisation /Association |
|--------------------------|---------------------|---------------------------|
| <b>Instrument/Sensor</b> | Local source node   | Owner                     |
| Instrument/System        | Local storage node  | Owner                     |
| Instrument/System        | Local access node   | Field Operator            |
| Station                  |                     | Station Owner             |
| Server                   | Remote access node  | Data Operator             |
| Server                   | Remote storage node | Data Manager              |
| Server                   | Public access node  | <b>Open Access</b>        |

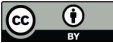

**Table 2.** Observational network data are organised using a limited set of dimensions, (typically) retrieved from the data itself and their associated metadata. Ingested data (RAW) are completed across the multi-dimensional data stores at level 0 (L0). Although metadata are essential for data analysis, they are not repeated at all levels (L) to improve interoperability.

| Data dimension | Production Level |    |    |    |
|----------------|------------------|----|----|----|
|                | RAW              | L0 | L1 | L2 |
| <b>time</b>    | ✓                | ✓  | ✓  | ✓  |
| <b>station</b> |                  | ✓  | ✓  | ✓  |
| system         | □                | ✓  | □  | □  |
| sensor         | □                | ✓  |    |    |
| channel        | □                | ✓  | □  | □  |
| <b>cell</b>    | ✓                | ✓  | ✓  | ✓  |
| attributes     | ✓                | ✓  | □  |    |
| attribution    |                  | ✓  | ✓  | ✓  |
| history        |                  | ✓  | ✓  | ✓  |
| license        |                  | □  | □  | ✓  |



**Table 3.** Instruments are classified into functional groups with sensors measuring at a point, along a path, or pixel area. Many instruments have dynamic source areas either because of meteorological conditions or if the sensor is mounted on a mobile platform.

| Group | Feature | Name                                        |
|-------|---------|---------------------------------------------|
| AWS   | point   | Automatic Weather Station                   |
| RAD   | point   | Radiometer System                           |
| IBS   | point   | Indoor Biometeorology System                |
| ECS   | point   | Eddy Covariance System <sup>a</sup>         |
| GAS   | point   | Gas Analyser System                         |
| SRS   | point   | Spectroradiometer System                    |
| ALC   | path    | Automatic Lidar and Ceilometer              |
| DWL   | path    | Doppler Wind Lidar                          |
| LAS   | path    | Large Aperture Scintillometer               |
| RSS   | path    | Radio Sounding System                       |
| SPS   | path    | Sun Photometer System                       |
| HIR   | area    | Hyper-Spectral Image Recorder               |
| MIR   | area    | Multi-Spectral Image Recorder               |
| TIR   | area    | Thermal Infrared Image Recorder             |
| VIR   | area    | Visible and Thermal Infrared Image Recorder |
| RGB   | area    | Visible Red-Green-Blue Image Recorder       |
| PHE   | area    | Phenocam                                    |

<sup>a</sup>) Can include a gas analyser instrument.



Table 4: Example production lines used in the data management system.

| Module | Group      | Production line                   | Instrument(s)                                                   | Primary products<br>(RAW, L0)                                                                          | Secondary products<br>(L1, L2)                                                                                                                                       | Example tools used for<br>the production                                                                                                                           |
|--------|------------|-----------------------------------|-----------------------------------------------------------------|--------------------------------------------------------------------------------------------------------|----------------------------------------------------------------------------------------------------------------------------------------------------------------------|--------------------------------------------------------------------------------------------------------------------------------------------------------------------|
| A      | PHE        | Phenocams,                        |                                                                 | RGB, IR images                                                                                         |                                                                                                                                                                      | Richardson et al. (2018,                                                                                                                                           |
|        | TIR        | Cloudcams                         |                                                                 |                                                                                                        |                                                                                                                                                                      | Phenocam Network)                                                                                                                                                  |
| B      | ALC        | Automatic lidar and<br>ceilometer | Vaisala CL31,<br>CL61;<br>Lufft CMK15                           | Attenuated backscatter;<br>layer detection;<br>diagnostics                                             | Mixed layer heights;<br>PM10 concentration                                                                                                                           | Kotthaus et al. (2020,<br>STRATfinder)                                                                                                                             |
| B      | DWL        | Doppler wind lidar                | HaloPhotonics<br>StreamLine                                     | Attenuated backscatter;<br>radial wind velocity;<br>diagnostics                                        | Wind direction;<br>wind speed;<br>velocity variance;<br>layer classification                                                                                         | Manninen et al. (2018)<br>and Vakkari et al.<br>(2019, FMI code);<br>Teschke and Lehmann<br>(2017) and Kayser et al.<br>(2021, DWD code);<br>Zeeman et al. (2022). |
| B      | LAS        | Scintillometers                   | Scintec BLS450,<br>BLS2000                                      | CN2                                                                                                    | Sensible heat flux                                                                                                                                                   | Fenner et al. (2024a)                                                                                                                                              |
| B      | ECS        | Flux towers                       | CampbellSci<br>IRGASON                                          | Wind components;<br>H <sub>2</sub> O, CO <sub>2</sub> fluctuations                                     | Wind direction;<br>wind speed;<br>velocity variance;<br>latent heat flux;<br>sensible heat flux;<br>CO <sub>2</sub> flux;<br>H <sub>2</sub> O flux;<br>momentum flux | Eddy Pro                                                                                                                                                           |
| C      | RSS        | Radio Sounding                    | SparvEmbedded<br>WindSond                                       | Air temperature;<br>Humidity;<br>Pressure;<br>Location                                                 | Calibrated values                                                                                                                                                    | Fenner et al. (2024b)                                                                                                                                              |
| C      | RAD<br>AWS | Sun trackers and ra-<br>diometers | KippZonen<br>CM21,<br>CG1,<br>CG4,<br>CHP1,<br>Solsys2,<br>CNR4 | Shortwave irradiance<br>(direct, diffuse);<br>Long-wave irradiance;<br>Shortwave out;<br>Long-wave out | Calibrated values;<br>On-site calibration with<br>roving reference system                                                                                            |                                                                                                                                                                    |



|   |     |                                                          |                                                             |                                                                                                                                                                              |                                                                                                                      |                                                            |
|---|-----|----------------------------------------------------------|-------------------------------------------------------------|------------------------------------------------------------------------------------------------------------------------------------------------------------------------------|----------------------------------------------------------------------------------------------------------------------|------------------------------------------------------------|
| C | SPS | Sun Photometers                                          | CIMEL X18-T                                                 | Directional irradiance in different wave-lengths                                                                                                                             | Aerosol optical depth                                                                                                | Giles et al. (2019, AERONET)                               |
| C | AWS | Outdoor street-level sensor network and weather stations | CampbellSci<br>ClimaVUE50,<br>Blackglobe-L;<br>PESSL LoRAIN | Air temperature;<br>humidity;<br>precipitation;<br>wind speed;<br>wind direction;<br>pressure;<br>global radiation;<br>lightning;<br>black globe temperature;<br>diagnostics | Mean radiant temperature;<br>Physiologically equivalent temperature (PET);<br>Universal Thermal Climate Index (UTCI) | Feigel et al. (in review),<br>VDI (2013, automated QC),    |
| C | IBS | Indoor sensor network                                    |                                                             | Air temperature;<br>humidity;<br>black globe temperature;<br>wind speed;<br>diagnostics                                                                                      | Mean radiant temperature;<br>Physiologically equivalent temperature (PET);<br>Universal Thermal Climate Index (UTCI) | Sulzer et al. (2022, on-line calibration and calculations) |





Table 5: Glossary.

| Term                     | Definition                                                                                                                                                                                                                                                                                                                                                                                                                      | Example                                                                                                                                                                 |
|--------------------------|---------------------------------------------------------------------------------------------------------------------------------------------------------------------------------------------------------------------------------------------------------------------------------------------------------------------------------------------------------------------------------------------------------------------------------|-------------------------------------------------------------------------------------------------------------------------------------------------------------------------|
| Data                     | Collected observations, recorded information.                                                                                                                                                                                                                                                                                                                                                                                   |                                                                                                                                                                         |
| Metadata                 | Description of circumstances, configurations, conditions, decisions under which data were collected and/or processed.                                                                                                                                                                                                                                                                                                           |                                                                                                                                                                         |
| Deployment               | The installation and operation of an instrument at a given station over a given timeframe.                                                                                                                                                                                                                                                                                                                                      | A ceilometer deployed from April 1 to April 15 at a given station.                                                                                                      |
| Deployment Configuration | The details of the deployment, namely the arrangement, alignment and programming of instruments in a deployment                                                                                                                                                                                                                                                                                                                 | Location, tilt, relative position (see Appendix A).                                                                                                                     |
| Event                    | A period in time in which either a sensor, a system, a station is affected by a situation that could affect data quality and/or scientific relevance.                                                                                                                                                                                                                                                                           | Snow cover on radiometers, weather forecast warnings for storm or heatwave, power outage, damage by vandalism, maintenance such as, e.g., sensor and platform cleaning. |
| Production level         | <p>Milestones in the recording, production and publication process of data and metadata.</p> <ul style="list-style-type: none"> <li>– RAW: Data files, as recorded and transmitted by systems and sensors, i.e., the primary measurements;</li> <li>– L0: Conversion to a common data structure;</li> <li>– L1: Computation, conversion to a common vocabulary;</li> <li>– L2: Final attribution for public release.</li> </ul> |                                                                                                                                                                         |
| Production line          | A set of consistently applied conversions, computations and other procedures to obtain consolidated, attributed secondary information from original measurements.                                                                                                                                                                                                                                                               | Mixed layer height determination, eddy covariance flux calculation, statistics                                                                                          |
| Station                  | A fixed geographic location where one or several instruments are deployed.                                                                                                                                                                                                                                                                                                                                                      | Eddy covariance station, observatory                                                                                                                                    |
| Platform                 | A structure or mobile device on which one or several instruments are deployed.                                                                                                                                                                                                                                                                                                                                                  | Tower, tripod, van, balloon, drone, aircraft                                                                                                                            |
| Network                  | A group of stations and/or platforms in a campaign. The grouping can be physical (same city), logical (same instrument model, same production line) and/or organisational (same owner).                                                                                                                                                                                                                                         | Street-level sensor network, indoor sensor network.                                                                                                                     |
| System (Instrument)      | A coherent device that contains one or more sensors and/or records and transmits data.                                                                                                                                                                                                                                                                                                                                          | Radiosonde, datalogger                                                                                                                                                  |
| Sensor (Instrument)      | A device that records an atmospheric or environmental property over time (and/or space).                                                                                                                                                                                                                                                                                                                                        | Thermometer, barometer, thermal camera                                                                                                                                  |



|         |                                                                                                                                                                                                                              |                                                                                            |
|---------|------------------------------------------------------------------------------------------------------------------------------------------------------------------------------------------------------------------------------|--------------------------------------------------------------------------------------------|
| Channel | Data dimension for variables with the same coordinates.                                                                                                                                                                      | Red-Blue-Green in an image, recordings with diagnostics/computations/statistics separately |
| Cell    | Data dimension for a single data point (one unit of observation, at one point in time, at the data collection level or subsequent statistics), defined with spatial and temporal boundaries.                                 |                                                                                            |
| Point   | Feature of data, a data point (or a basic volume).                                                                                                                                                                           | See Table 3                                                                                |
| Path    | Feature of multi-dimensional data: <ul style="list-style-type: none"> <li>– Trajectory: way-points for each cell;</li> <li>– Transect: between two locations;</li> <li>– Profile: along an axis (i.e., vertical).</li> </ul> | See Table 3                                                                                |
| Area    | Feature of multi-dimensional data, e.g, raster, grid, image pixel.                                                                                                                                                           | See Table 3                                                                                |



**Table 6.** Notices (e.g., disclaimers) accompanying data publications in the *urbisphere* project. Data published in near-time have additional text (bold). Author list is updated at publication with an open licence.

| Notice Type             | Production                                                                                                                                                                                                                                                                                                                                                                                                                                                                                                                                                                                                                                                                                                                                        | Publication                                                                                                                                                                        |
|-------------------------|---------------------------------------------------------------------------------------------------------------------------------------------------------------------------------------------------------------------------------------------------------------------------------------------------------------------------------------------------------------------------------------------------------------------------------------------------------------------------------------------------------------------------------------------------------------------------------------------------------------------------------------------------------------------------------------------------------------------------------------------------|------------------------------------------------------------------------------------------------------------------------------------------------------------------------------------|
| Author                  | Principal Investigators (PIs) of the project                                                                                                                                                                                                                                                                                                                                                                                                                                                                                                                                                                                                                                                                                                      | List of authors in compliance with the (national, institutional) academic code of conduct.                                                                                         |
| Copyright License       | <i>“Some rights reserved.”</i>                                                                                                                                                                                                                                                                                                                                                                                                                                                                                                                                                                                                                                                                                                                    | <i>“This work is licensed under a &lt;a rel=“license” href=“http://creativecommons.org/licenses/by/4.0/”&gt;Creative Commons Attribution 4.0 International License&lt;/a&gt;.”</i> |
| Creator                 | <i>“This work is owned by the PIs of the &lt;a rel=“author” href=“http://urbisphere.eu”&gt;urbisphere project&lt;/a&gt;.”</i>                                                                                                                                                                                                                                                                                                                                                                                                                                                                                                                                                                                                                     |                                                                                                                                                                                    |
| Material                | <i>“The notices cover data in databases, APIs, text and images contained in the work.”</i>                                                                                                                                                                                                                                                                                                                                                                                                                                                                                                                                                                                                                                                        |                                                                                                                                                                                    |
| Attribution             | <i>“The [creation and] curation of this work has been funded by the European Research Council (ERC) under the European Union’s Horizon 2020 research and innovation programme (grant agreement No 855005).”</i>                                                                                                                                                                                                                                                                                                                                                                                                                                                                                                                                   |                                                                                                                                                                                    |
| Disclaimer <sup>a</sup> | <i>“The use of the work is at the user’s own risk. The authors, the involved institutions, and/or the European Research Council accept no liability for material or non-material damage arising from the use or non-use or from the use of incorrect or incomplete information in this work. <b>There is no legal claim to permanent availability of this work.</b> The authors, the involved institutions, and/or the European Research Council do not guarantee the completeness <b>and timeliness</b> of the information provided. The authors, the involved institutions, and/or the European Research Council are not responsible for any use that may be made of the information in this work. The legal provisions remain unaffected.”</i> |                                                                                                                                                                                    |

<sup>a</sup>) Additional wording is used for near real-time publication (text in bold).

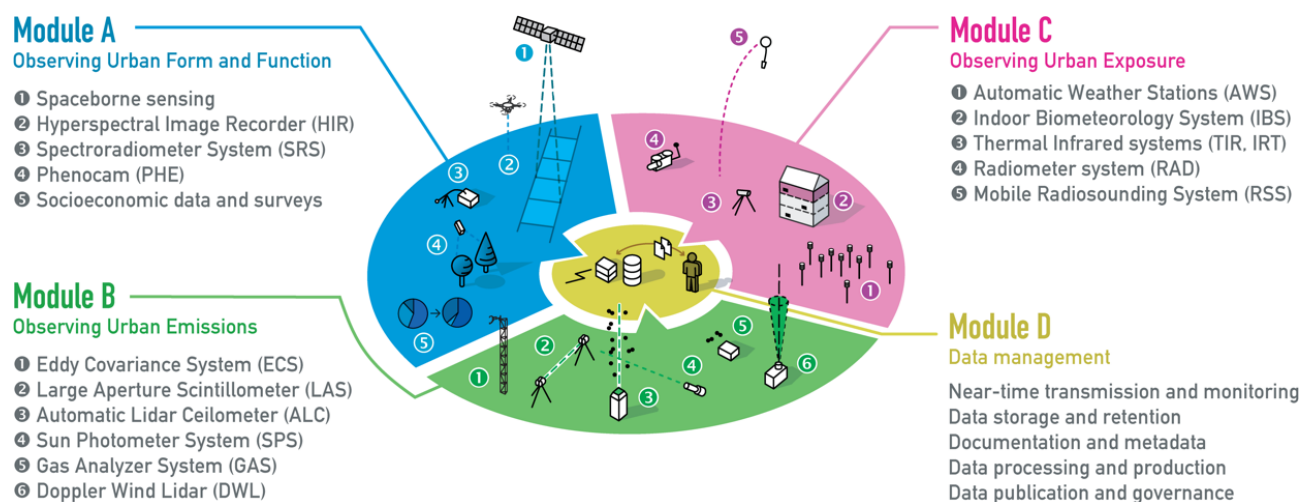

**Figure 1.** Conceptual diagram of the modular observation system operated in the *urbisphere* project. Modules A to C collect observational data in different cities, Module D integrates them in the unified data management approach.

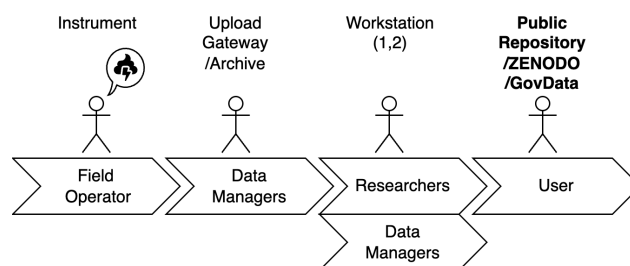

**Figure 2.** Operational connections are entwined between the physical and logical networks and the organisations.

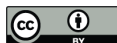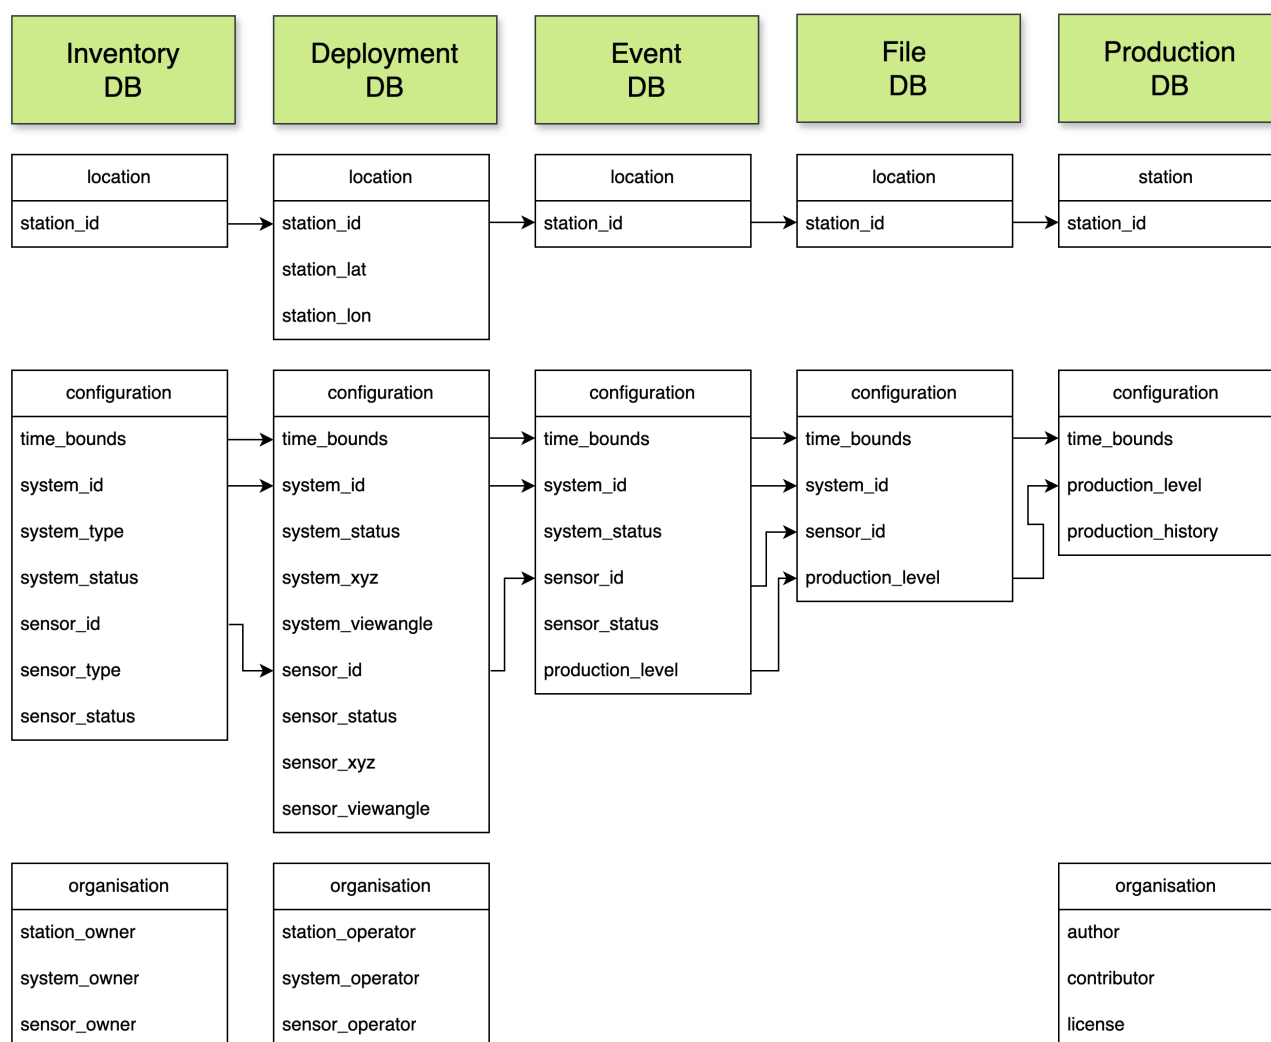

**Figure 3.** Conceptual overview of databases (DBs) that form the metadata, and the primary attributes that connect the DBs.



Before

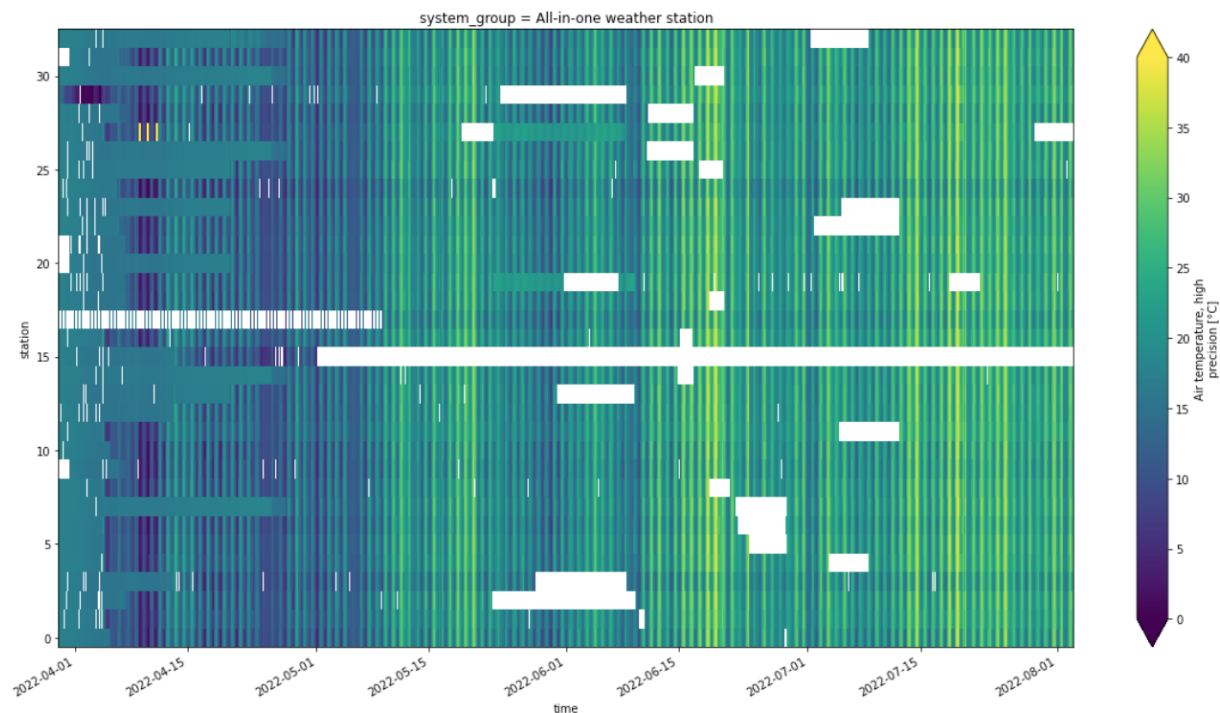

After

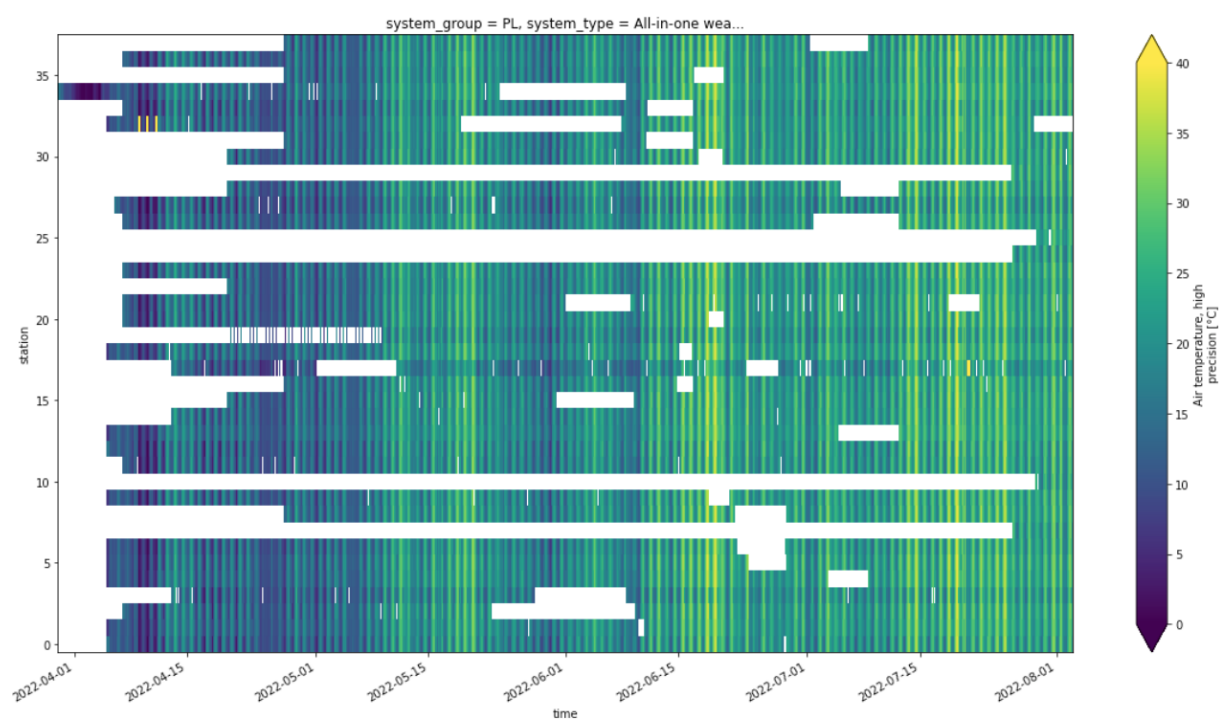

**Figure 4.** Example of data (air temperature) through time per station deployed (Freiburg, Germany): (upper) pre- and (lower) post-metadata application for masking invalid data. In this case, the instruments (autonomous Automatic Weather Stations) report data if powered, so metadata are needed to define operational deployment periods.



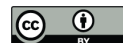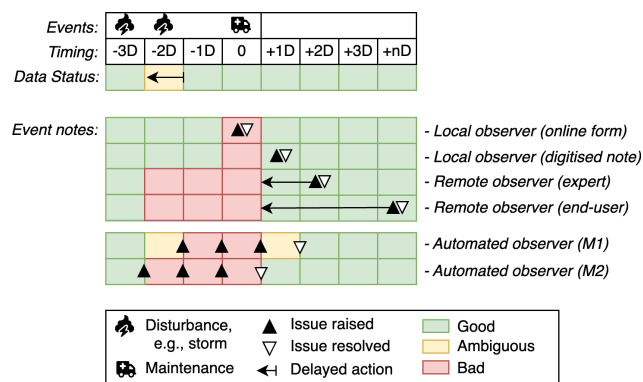

**Figure 5.** Conceptual timeline (days, D) before and after an event is raised and resolved, with different examples of when and who are involved, including two automated methods (M1, M2).

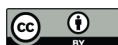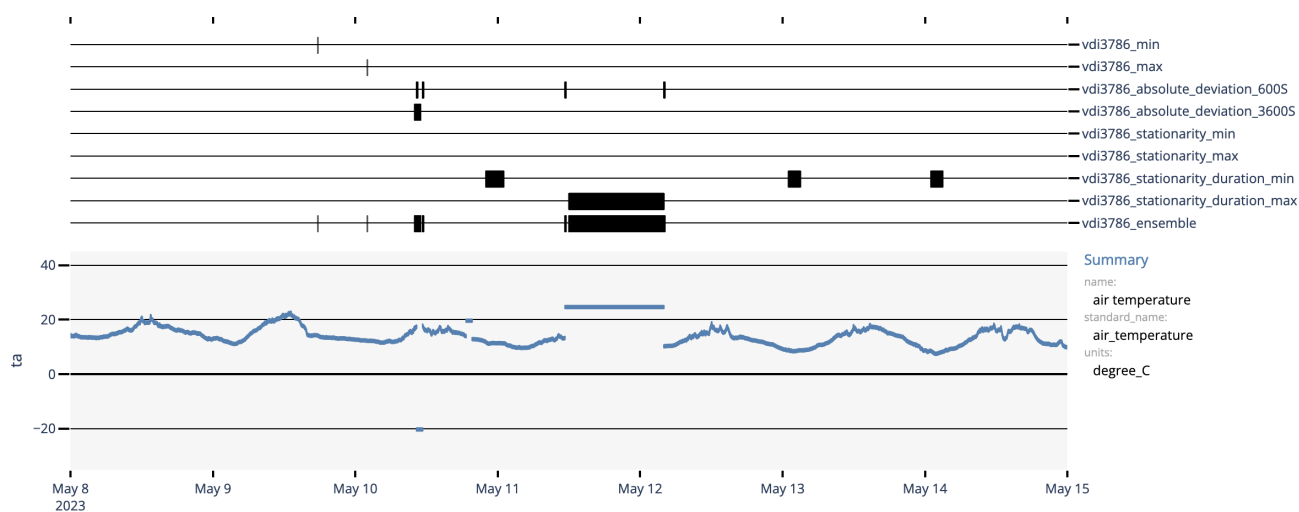

**Figure 6.** Example of automatic quality control for AWS air temperature (ta, bottom panel) data to illustrate VDI 3786 (VDI, 2013) quality control indicators (vertical lines = bad quality, top panel).

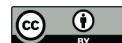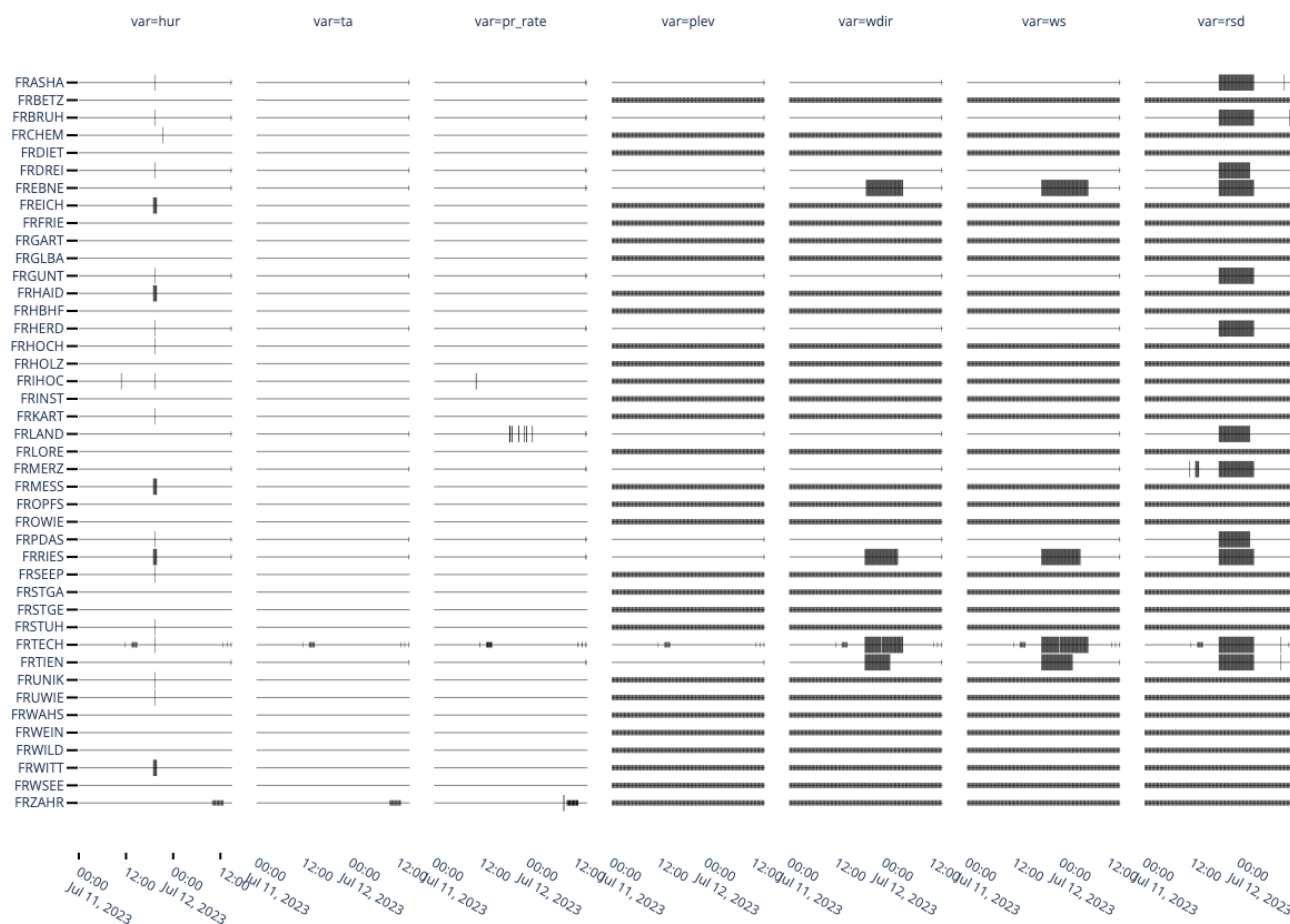

**Figure 7.** VDI 3786 (VDI, 2013) quality control indicators applied to the Freiburg AWS network (rows) during a storm (11 to 12 Jul 2023) for all variables (precipitation *pr\_rate*; air temperature *ta*; relative humidity *hur*; wind speed *ws*; wind direction *wd*; station pressure *plev*; incoming short wave (or global) radiation *rsd*) with quality flags shown: long = “bad”, short = missing.

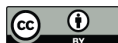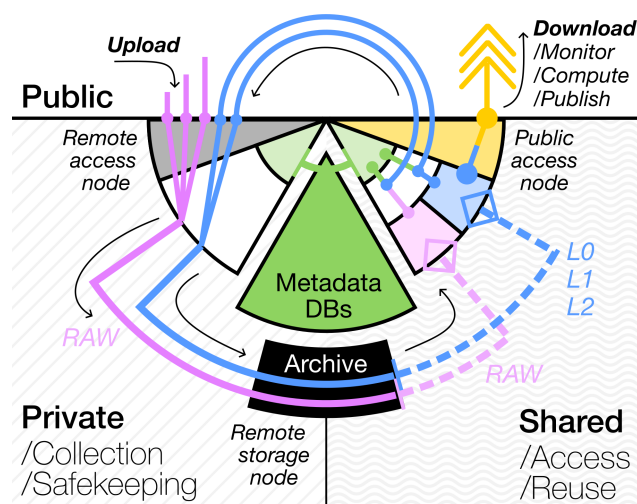

**Figure 8.** Access to data is needed from both public and private domains, using private data infrastructure. Archived data and metadata are read-only accessible (dashed lines, light colors) for shared production (L0, L1, L2), which is redirected to the archive and interfaces for public access and other uses. DB: Database

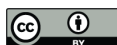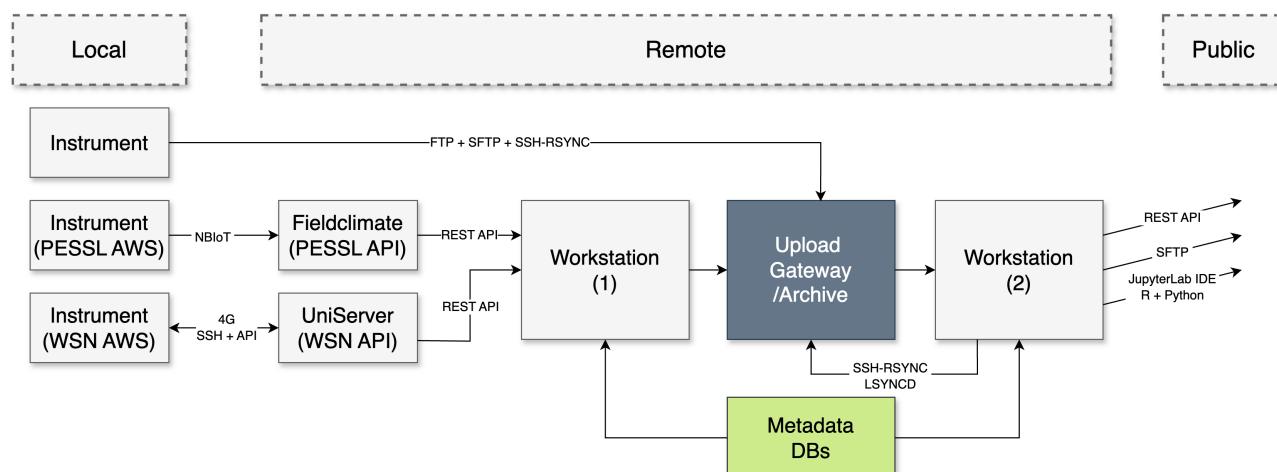

**Figure 9.** Example of a data-stream from multiple networks and various databases (DBs), with the applications used in the production steps and the data store formats (bottom row) using scheduled scripts. The typical data stream is from local instruments to a remote server that provides public access.

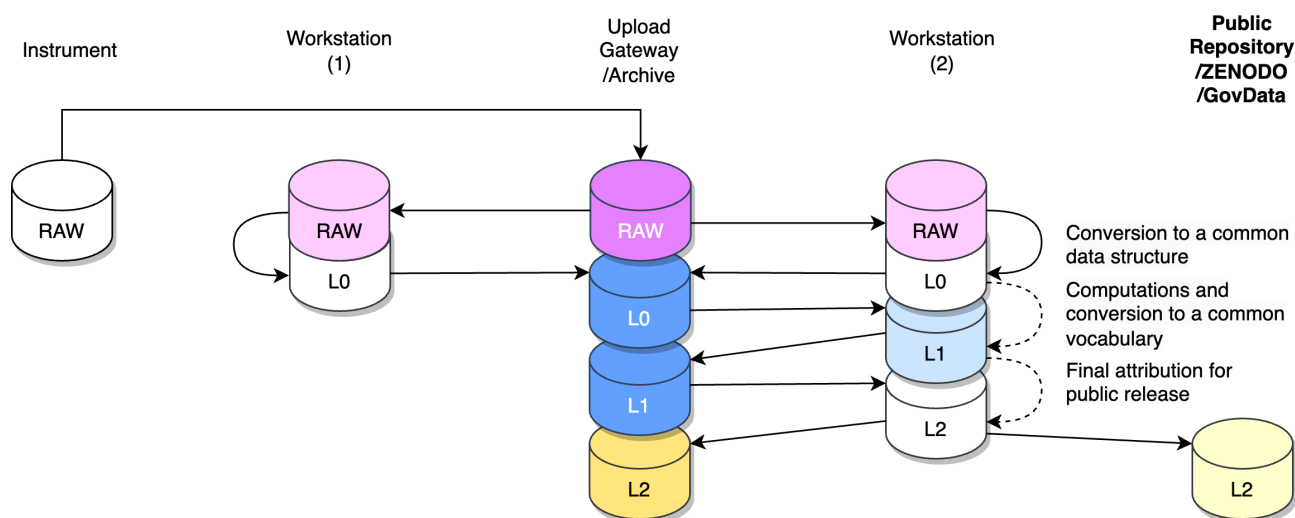

**Figure 10.** Pathways of data (from RAW to intermediate (L0, L1) and publication (L2)) with archiving at multiple stages. Data are shared (dark) and replicated (light).

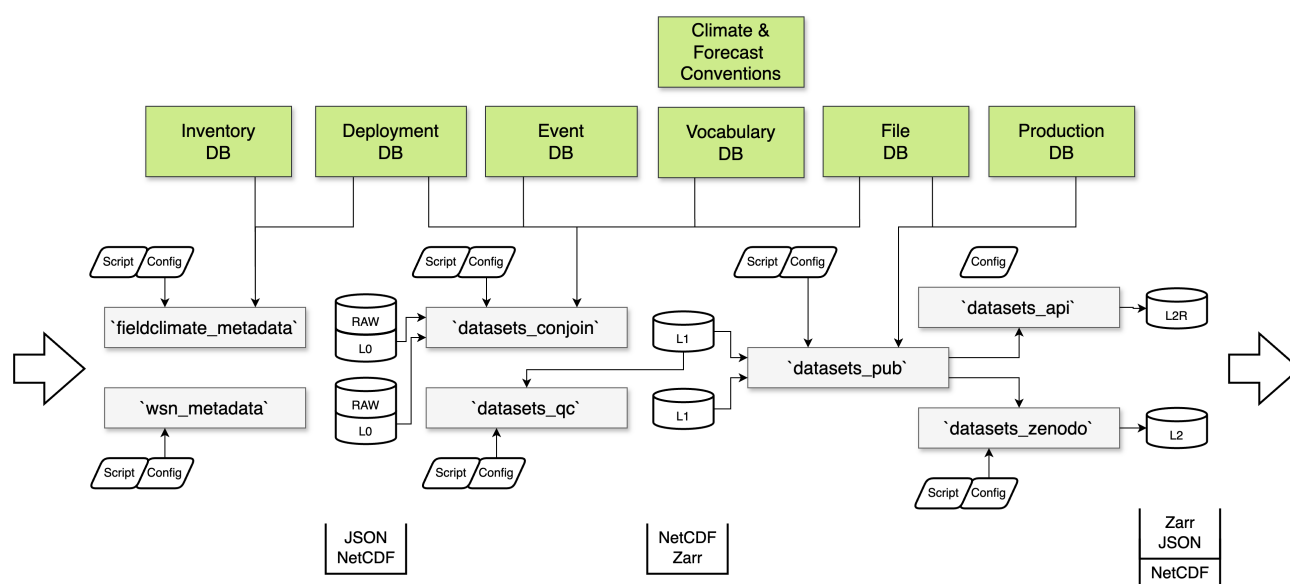

**Figure 11.** An example of a production line, the various databases (DBs) and applications used in the production steps and the (bottom) data formats for data products for multiple uses. Scheduled scripts generate configurations that actuate the production line code during automation.

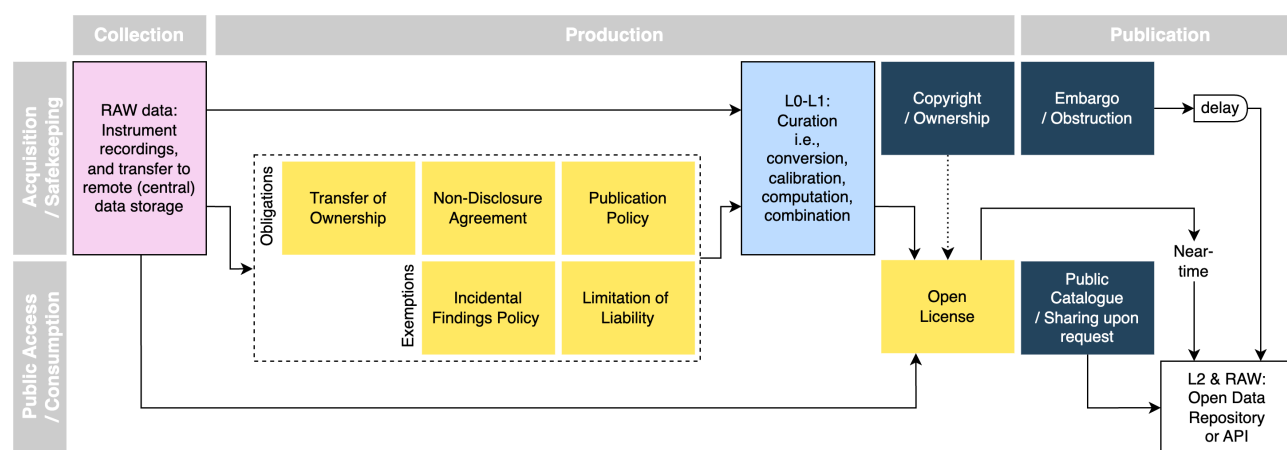

**Figure 12.** Pathways to making data publications public accessible require the different data governance issues to be formalized early, allowing access to be rapid after any restrictions.



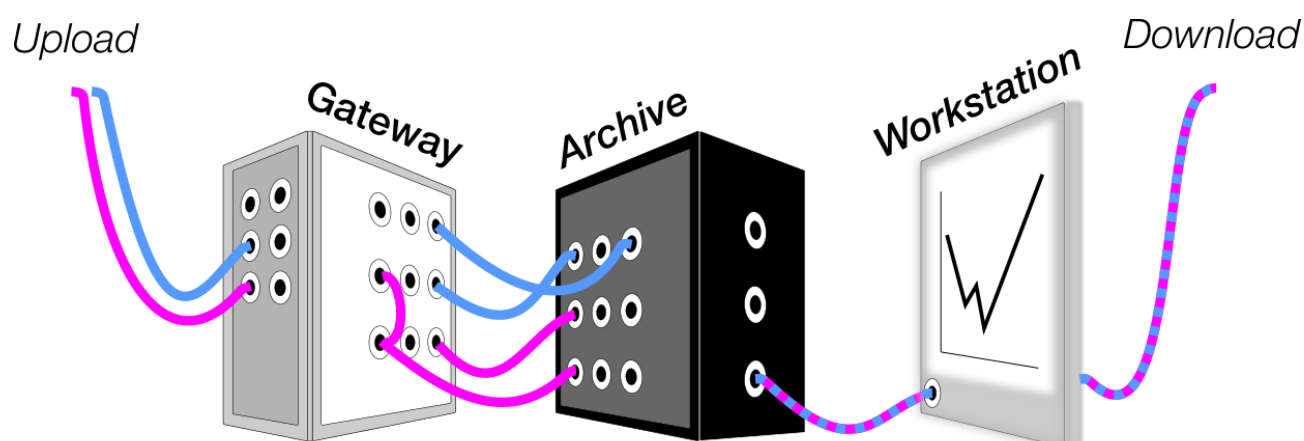

**Figure 13.** An info-graphics using a switchboard analogy is used to communicate where data is uploaded, where data can be downloaded and where data streams are being managed or modified.



## Appendix A: Coordinate Systems

In an urban deployment ensuring a “station” is representative of the scale of interest is challenging, as is finding sites to deploy sensors. Often the place a sensor will be mounted will be in a complex location, resulting in a need to a hierarchy of spatial coordinates (Figure A3). For example, providing coordinates for a sensor mounted on a boom that extends off the edge of a roof is challenging, yet required for accurate documentation (Figure A). Similarly, further complications arise with sensors within buildings (Figure A2). Fortunately, high-resolution geographic information systems are extremely common in cities, helping this process (e.g., Fenner et al., 2024b; Hertwig et al., in preparation). Here, we use the follow coordinate systems:

- The *Coordinate Reference System* (CRS) is a commonly-used global system, i.e., WGS84 or EPSG:4326. In some cases the UTM or a European reference system (i.e., ETRS89) can be useful alternatives, but their use in reporting must be explicitly specified in metadata.
- The *Vertical Coordinate Reference System* (VRS) by default uses a global or regional system (e.g., European reference EVRS by EUREF; specifically the European Vertical Reference Frame, EVRF2007/EVRF2019, as it is integrated in the Global Navigation Satellite Systems, GNSS, and tied to the level of the Normaal Amsterdams Peil; Bundesamt für Kartographie und Geodäsie, 2023), and must be specified explicitly with a datum and coordinate system otherwise.
- In some cases, National Reference Systems may be used, when *urbisphere* observations need to be combined with local GIS data (e.g., spatial datasets provided by local authorities). In these cases, the respective ellipsoid and datum should also be specified.
- *Urban heights*: in urban deployments, all instrument configurations are linked to an “active surface” for which the height can be ambiguously interpreted as height above the ground (i.e., ground surface, topographic elevation) and height above a structure (e.g., a floor in a building, a roof terrace, a pavement level). Therefore, estimates of the altitude of the observation volume, as well as the altitude/height and properties of the (nearest) urban feature and the surrounding topographic elevation are documented in the metadata (Figure A1b).
- *Local coordinate systems*: to help with the documentation of locations in the physical network, a local reference system was used. A fixed point on the active surface is defined as a station, from which offsets are measured in the field, such as the distance to the platform and any offsets from the platform to the the observed volume (Figure A1a). Any offset in the alignment with zenith and north are recorded as tilt and bearing (elevation and azimuth in CF standards; which typically are also recorded, e.g., by remote sensing systems and mobile platforms (compare Figure A3d and Figure A3e, respectively)).

The information is stored in coordinates that are consistent with conventions and the hierarchical (physical) network (Table A1; see also Table 1). It is helpful to assume defaults, as particularly the vertical coordinates (altitude, topographic elevation of the ground level) take care to be determined and may be revised (Table A2).



Table A1: Coordinate attributes and the relationship between coordinate reference systems (i.e., station, using global CRS and VRS references; system, sensor, channel using local references) and metadata (i.e., conventions, standards, definitions, units).

| Coordinate Name               | Standard Name          | Optional suffix             | Convention                | Reference | Units  | Comment                                                                                                                                             |
|-------------------------------|------------------------|-----------------------------|---------------------------|-----------|--------|-----------------------------------------------------------------------------------------------------------------------------------------------------|
| station_lat                   | lat                    | bounds                      | CF                        | CRS       | degree | Default CRS “epsg:4326”                                                                                                                             |
| station_lon                   | lon                    | bounds                      | CF                        | CRS       | degree | Default CRS “epsg:4326”                                                                                                                             |
| station_height                | height                 | bounds                      | CF                        |           | m      | Vertical distance above the surface.                                                                                                                |
| station_altitude              | altitude               | bounds                      | CF                        | VRS       | m      | Vertical distance above mean sea level.                                                                                                             |
| station_ground_level_altitude | ground_level_altitude  | bounds                      | CF                        | VRS       | m      | Vertical distance above the named surface “sea_level”; Observed or derived from a Digital Surface Model; a.k.a. surface elevation.                  |
| station_surface_height        | surface_height         | bounds                      |                           |           | m      | Vertical distance of a surface above the ground level.                                                                                              |
| _above_ground_level           | _above_ground_level    |                             |                           |           | m      | Surface name, e.g., roof-top, ground                                                                                                                |
| station_surface_name          |                        |                             |                           |           |        |                                                                                                                                                     |
| station_surface_type          |                        | lcz;<br>ura;<br>clc;<br>osm | cf<br>classifi-<br>cation |           |        | Landcover classification. Optional as Local Climate Zone (lcz), Urban Atlas (ura), CORINE Landcover (clc) or OpenStreetMap object identifier (osm). |
| system_azimuth_angle          | platform_azimuth_angle | bounds                      | CF                        | station   | degree |                                                                                                                                                     |
| system_zenith_angle           | platform_zenith_angle  | bounds                      | CF                        | station   | degree |                                                                                                                                                     |
| system_x                      |                        | bounds                      |                           | station   | m      | Cartesian distance to Reference                                                                                                                     |
| system_y                      |                        | bounds                      |                           | station   | m      | Cartesian distance to Reference                                                                                                                     |
| system_z                      |                        | bounds                      |                           | station   | m      | Cartesian distance to Reference                                                                                                                     |
| sensor_azimuth_angle          | sensor_azimuth_angle   | bounds                      | CF                        | system    | degree |                                                                                                                                                     |
| sensor_zenith_angle           | sensor_zenith_angle    | bounds                      | CF                        | system    | degree |                                                                                                                                                     |
| sensor_view_angle             | sensor_view_angle      | bounds                      | CF                        | system    | degree |                                                                                                                                                     |
| sensor_x                      |                        | bounds                      |                           | system    | m      | Cartesian distance to Reference                                                                                                                     |
| sensor_y                      |                        | bounds                      |                           | system    | m      | Cartesian distance to Reference                                                                                                                     |
| sensor_z                      |                        | bounds                      |                           | system    | m      | Cartesian distance to Reference                                                                                                                     |



|        |        |         |        |                                  |
|--------|--------|---------|--------|----------------------------------|
| cell_x | bounds | sensor; | m;     | Cartesian distance to Refer-     |
|        |        | CRS     | degree | ence; alternatively as longitude |
|        |        |         |        | time series                      |
| cell_y | bounds | sensor; | m;     | Cartesian distance to Refer-     |
|        |        | CRS     | degree | ence; alternatively as latitude  |
|        |        |         |        | time series                      |
| cell_z | bounds | sensor; | m      | Cartesian distance to Refer-     |
|        |        | VRS     |        | ence; alternatively as altitude  |
|        |        |         |        | time series                      |

---

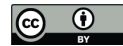

**Table A2.** Coordinate attributes and their meaning for metadata that are required, partially required or required but set with a default value.

| Coordinate Name                           | Data Dimension | Requirement      | Default |
|-------------------------------------------|----------------|------------------|---------|
| station_lat                               | station        | ✓                |         |
| station_lon                               | station        | ✓                |         |
| station_height                            | station        | ✓ <sup>b</sup>   | 0       |
| station_altitude                          | station        | ✓ <sup>a,b</sup> |         |
| station_ground_level_altitude             | station        | ✓ <sup>b</sup>   |         |
| station_surface_height_above_ground_level | station        | ✓ <sup>b</sup>   | 0       |
| station_surface_name                      | station        | □                | ground  |
| station_surface_type                      | station        | □                |         |
| system_azimuth_angle                      | system         | ✓ <sup>b</sup>   | 0       |
| system_zenith_angle                       | system         | ✓ <sup>b</sup>   | 0       |
| system_x                                  | system         | ✓ <sup>b</sup>   | 0       |
| system_y                                  | system         | ✓ <sup>b</sup>   | 0       |
| system_z                                  | system         | ✓ <sup>b</sup>   | 0       |
| sensor_azimuth_angle                      | sensor         | ✓ <sup>b</sup>   | 0       |
| sensor_zenith_angle                       | sensor         | ✓ <sup>b</sup>   | 0       |
| sensor_view_angle                         | sensor         | ✓ <sup>b</sup>   | 0       |
| sensor_x                                  | sensor         | ✓ <sup>b</sup>   | 0       |
| sensor_y                                  | sensor         | ✓ <sup>b</sup>   | 0       |
| sensor_z                                  | sensor         | ✓ <sup>b</sup>   | 0       |
| cell_x                                    | cell           | ✓ <sup>b</sup>   | 0       |
| cell_y                                    | cell           | ✓ <sup>b</sup>   | 0       |
| cell_z                                    | cell           | ✓ <sup>b</sup>   | 0       |

<sup>a)</sup> Required, but can be derived. <sup>b)</sup> Required, but a default value can be assumed if omitted.

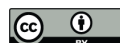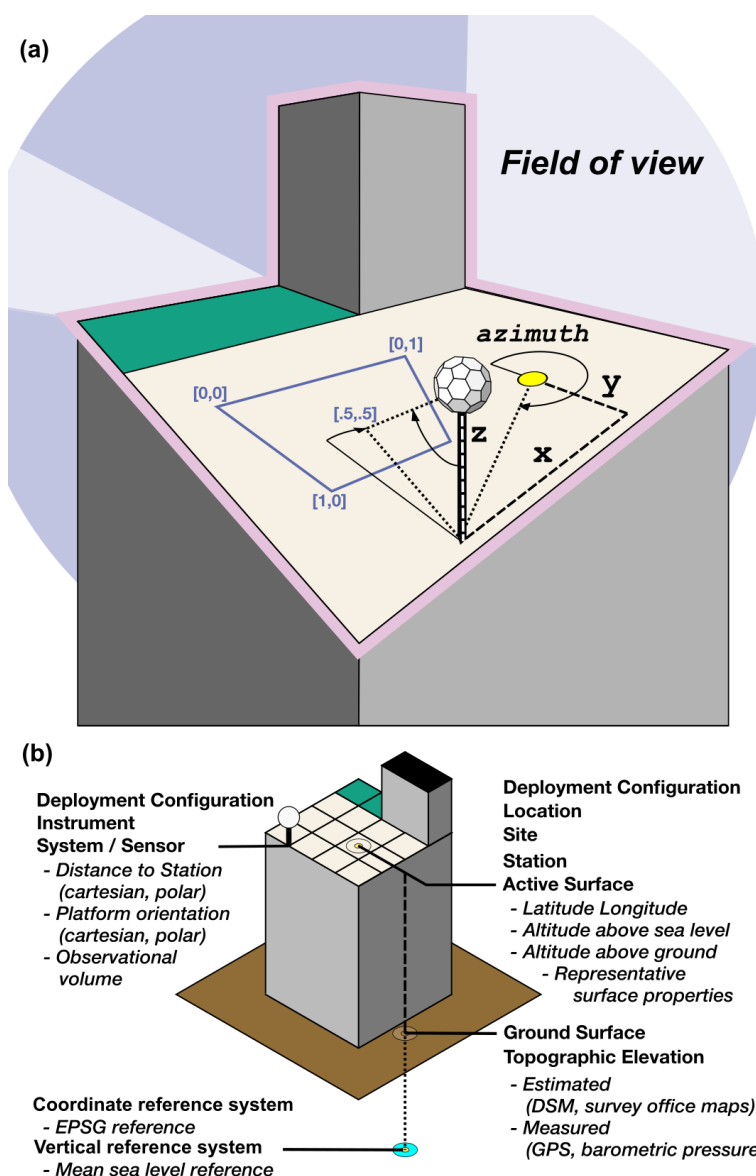

**Figure A1.** Deployment on a building roof with the relations between (a) a local station, platform, instrument, recorded image and related coordinate systems in polar and Cartesian coordinates, and (b) local and global coordinate reference systems as well as features in ordinance inventory and Earth Observation.

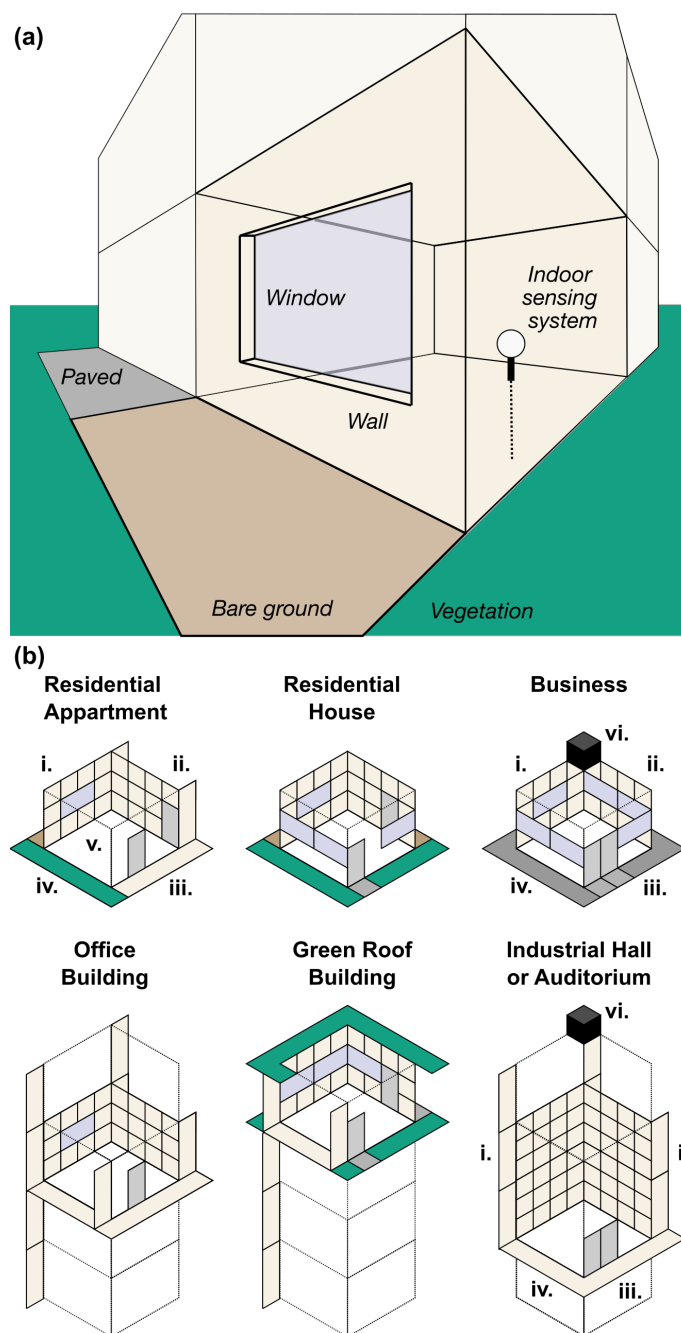

**Figure A2.** Indoor measurements of ambient temperature require uniquely different metadata, compared to classical outdoor measurements, including additional coordinates for the orientation and features of the building, the room, the walls and the adjacent space, as well as of objects that generate, transmit, transport or intercept radiative heat.

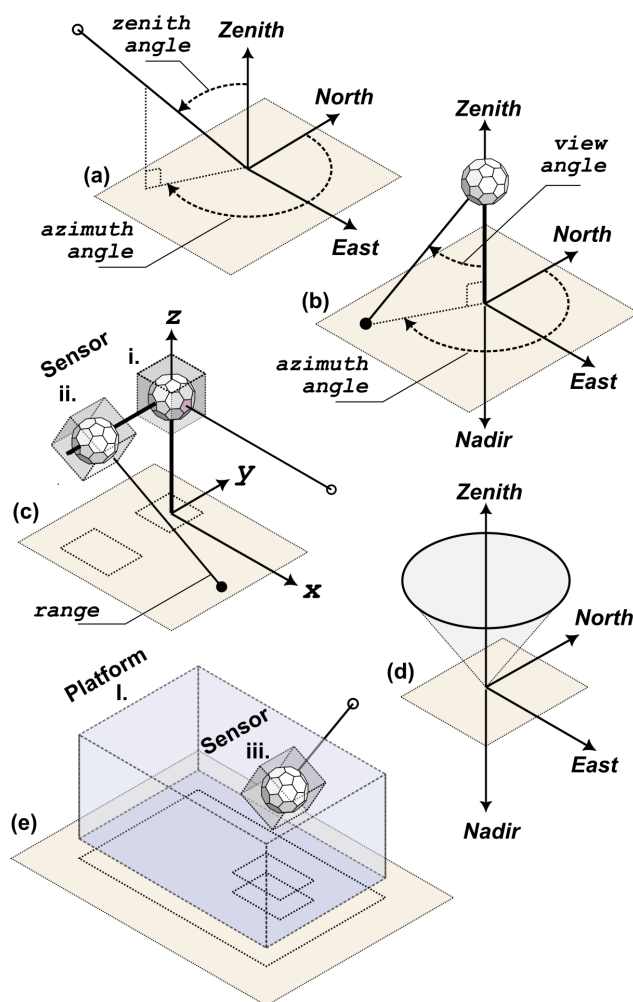

**Figure A3.** Metadata definitions for the relationships between platforms and instruments, and their coordinate systems.





## A1 Time

490 Data management operates in close to real-time or in short-interval batch acquisition (Figure A4). All system clocks use UTC time (ideally), but if local time (without daylight saving) is locally essential the metadata includes this information.

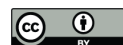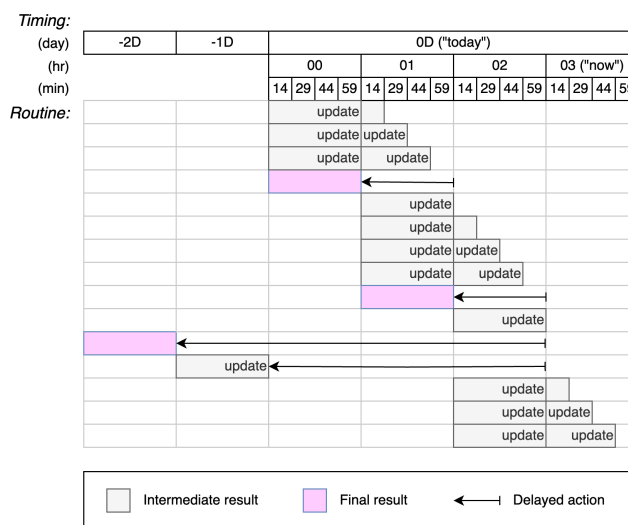

**Figure A4.** Production schedule includes batch routines, sub-hourly and daily overlapping routines to recover data if short-term interruptions in networks occur (e.g., within last 48 h).



## Appendix B: Curation

### B1 File names

495 To define locations, deployment configurations and production stages, short-hand identifiers are used to structure both the metadata database relational features, and the directories and files for data (Table B1).

- *Project identifier*: the organisational framework in which a data record is collected or computed. Much of the procedures and agreements depend on a formal separation of organisational units within the organisational network (see, e.g., Table 1);
- *Production level* (RAW, L0, L1, L2, see section 3.5): the original source data need to be archived in a different location  
500 than subsequent production stages;
- *Instrument identifier vs Location identifier*: the (re-)organisation of data files by location can vastly improve the overview of the network, but a deployed configuration is typically unaware of its location and can only reliably provide instrument serial numbers as identification. The location short code is a CCNNNN format, which merges a two-character CC city code (optional) and a four-character NNNN station identifier. Station names are generally based on geographic neighborhood  
505 and not street names or property names, to avoid referring to a company/trademark or disclose exact locations, where privacy is affected. The station codes do not necessarily need to be unique, for example, stations FRCHEM and PACHEM operated simultaneously and are located in Freiburg (FR) and Paris (PA), respectively.
- *Instrument classification*: most instruments can be configured to use a model identifier in their output file path and file header. In some cases, the output file format did not differ between instrument models (e.g., TOA5 data logger files) and  
510 the output for a instrument group (e.g., data loggers) could be combined during subsequent production steps.
- *Time*: all file names include a timestamp or time bounds (in UTC), and in case large numbers of daily files are expected, additional sub-folders with year or date information facilitate manual file browsing.



**Table B1.** Naming convention for different types by production level with patterns and attributes.

| Production level | Type          | Naming convention pattern (example)           | Attribute                           |
|------------------|---------------|-----------------------------------------------|-------------------------------------|
| RAW              | folder        | /srv/meteo/archive/./                         | base path                           |
|                  | folder        | urbisphere/                                   | project name                        |
|                  | folder        | data/RAW/                                     | production level                    |
|                  | folder        | by-source/smuobs/                             | network identifier                  |
|                  | folder        | by-serialnr/France/Paris/CL61/U4910813/       | campaign and instrument identifiers |
|                  | file          | U4910813_20231126_090916.nc                   | instrument recorded file name       |
| L0               | folder        | /srv/meteo/archive/./                         | base path                           |
|                  | folder        | urbisphere/                                   | project name                        |
|                  | folder        | data/L0/                                      | production level                    |
|                  | folder        | by-source/smuobs/                             | network identifier                  |
|                  | folder        | by-location/France/Paris/PAAUNA/ALC/U4910813/ | campaign and instrument identifiers |
|                  | file          | raw211                                        | production name                     |
|                  | file (cont'd) | _set(*, **, ***)                              | production identifier(s)            |
|                  | *             | fr.paris.PAAUNA                               | location identifier(s)              |
|                  | **            | ALC_U4910813                                  | system group and serial no.         |
|                  | ***           | 20231126T000000_20231127T000000               | time bounds (ISO8601)               |
|                  | file (cont'd) | _version(****)                                | version identifier(s)               |
|                  | ****          | v1.0.1                                        | semantic version                    |
|                  | file (cont'd) | .nc                                           | file extension(s)                   |



## Appendix C: Services

### C1 Computing Environment

515 A system-wide copy of the Anaconda Python distribution (ana, 2023) is installed on Workstations in order to provide users with preconfigured python and R environments. These environments are updated occasionally to introduce new features. The environments contain packages for scientific data analytics (e.g., functions for calculation, access to common data file formats) and access to the metadata DBs. Taking a pragmatic approach, we rely on Python libraries supported by the Numerical Foundation for Open Code and Useable Science (NumFOCUS). Libraries (*xarray*; *pandas*; *numpy*; *scipy* and *dask*), plus useful  
520 extensions to NetCDF (e.g., data access: *zarr*, time conversion: *cftime*, unit conversion: *cfunits*) allow the produced NetCDF database files to be used in R and Matlab ICEs and by dedicated NetCDF tools (e.g., NCO, CDO, Panoply), and vice-versa.

### C2 Online access

Each workstation functions as a web server, with certificate-based communication (HTTPS) using the host institution IT services and authentication for security. Web hosting has different domains for public and private access. The private domain have  
525 basic authentication with credentials entered in a web browser pop-up.

Apps are not private because of sensitive information, but because of performance cost and operational risks linked to public access. Some experimental services have additional authentication (e.g., JupyterLab; Figure C1). Although setting up web services requires system administrator changes to the workstation web proxy, researchers are free to manage their Apps independently.

### 530 C3 Apps

Web app templates, using open source projects (e.g., shiny, panel), are modified to comply with publication guidelines, host institution policies, project policies, European law (e.g., terms of use statement) and other legal terms. The template header and footer information (e.g., location, contact, creation time, terms of use) identify version status and formal reference if used (e.g., during talks). The templates are prepared using the *plotly* library, as it is available for multiple ICEs (e.g., R, python).

535 Apps assist field operators, data managers and researchers in diagnostics and early exploration:

- *Diagnostics* to help monitor the network data stream (Figure C2): overview of recently added or modified files, automated tasks status reports, interactive figures showing file count for individual systems in past hour and days.
- *Visualisation* of variables gives operational status of dynamic processes (Figure C3): templates combining metadata and data, give automatic, distributed, provisional data for review of quality and availability (Figure C4, Figure C5, Figure C6  
540 and Figure C7b).
- *Outreach* providing community-available near real-time data (Figure C7c; Feigel et al., in review): can also be usable as a diagnostic tool.



#### C4 Data API

545 Methods to expose NetCDF4 data stores through a Representational State Transfer Application Programming Interface (REST API) are provided by libraries (*zarr*, *xarray*, *fastapi*, *fsspec*, *xpublish*; Figure C7b). JSON output format, a widely supported text-based encoding format for data storage, is added to the API as local governments (e.g., City of Freiburg) require it for applications (e.g., urban planning, civil protection, disaster management, climate adaptation). However, as JSON is unsuitable for streaming large data queries (>10 MB), an alternative format is needed (i.e., Zarr). The JSON data output can be converted back to NetCDF (i.e., using *xarray*), ensuring both Zarr and JSON output of the API can be used, interchangeably.

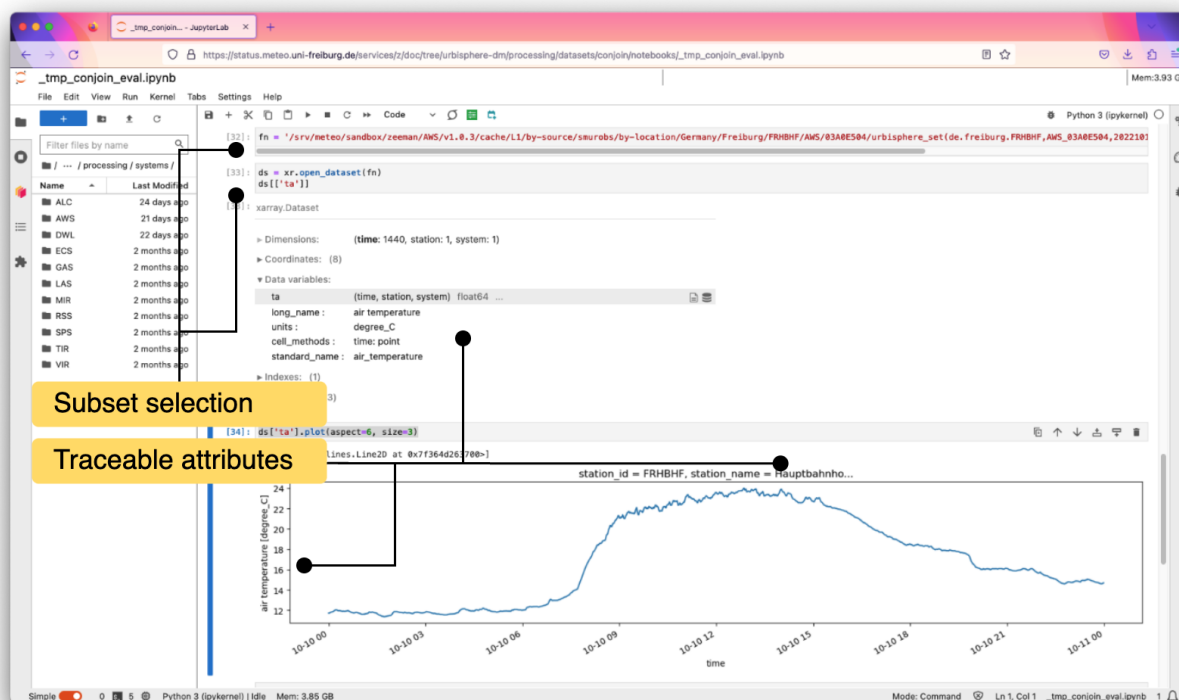

**Figure C1.** An example of web browser data science environment and ICE (JupyterLab) with simple code inspecting data.

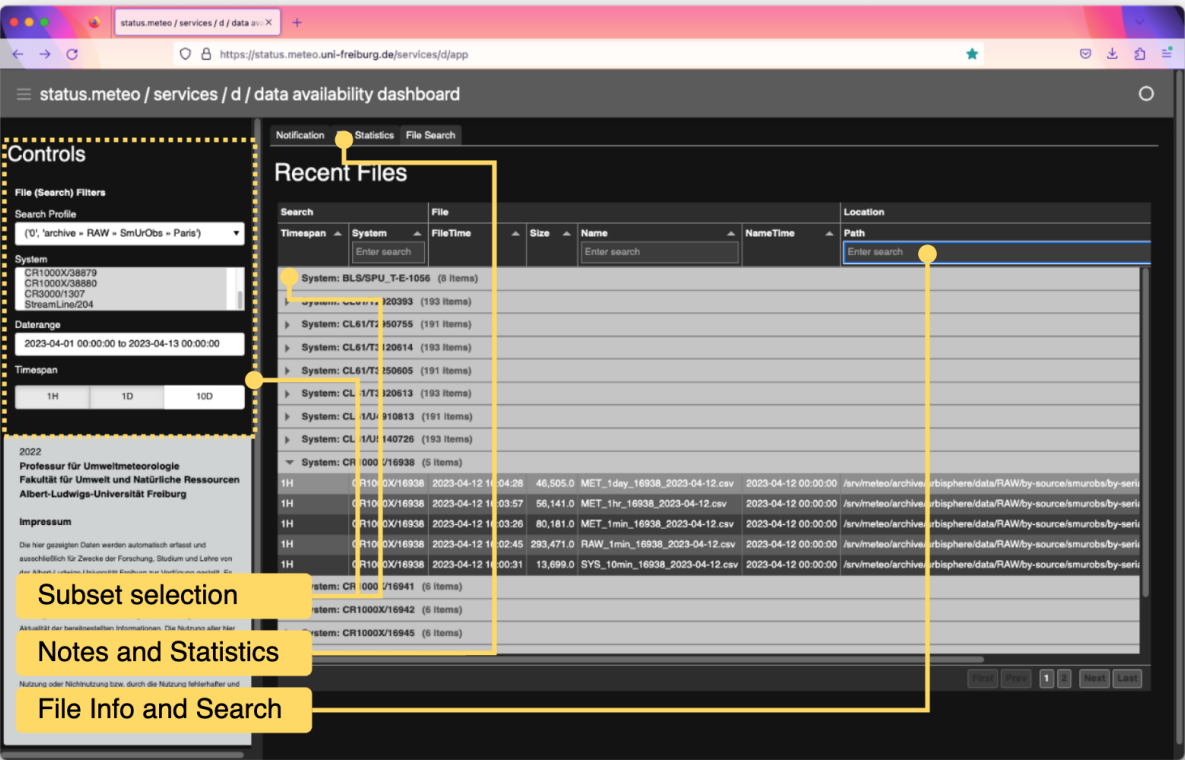

Figure C2. As Fig. C3 but, of most recently changed files and folders by campaign (e.g., city).



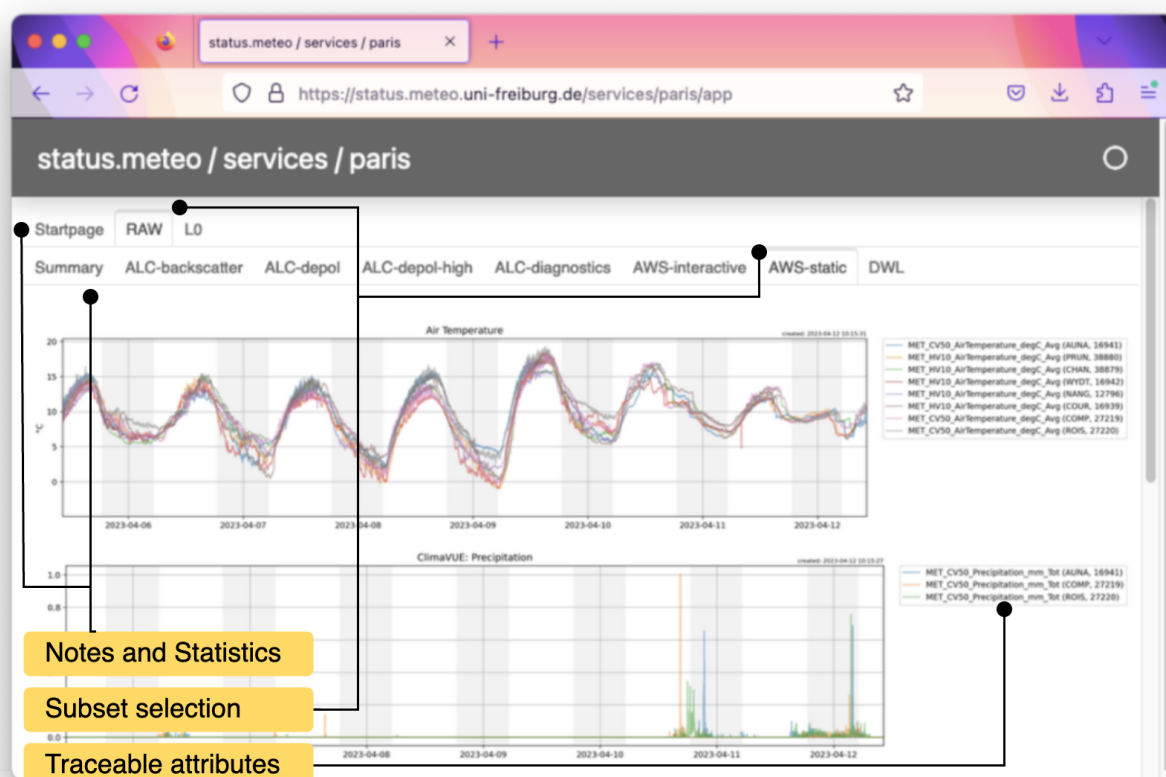

**Figure C3.** Dashboard App used to visualise most recent data for inspection.

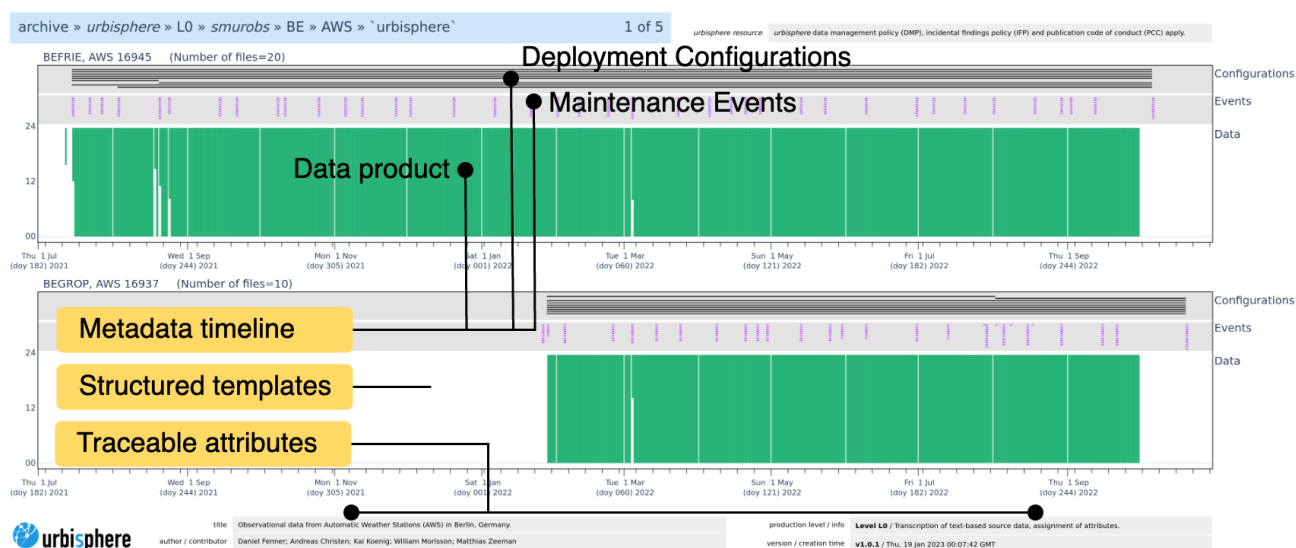

**Figure C4.** Example overview of available data as time against time of day, includes metadata attributes to help identify attribution, location context, production information and a time line of events as known at time of creation.

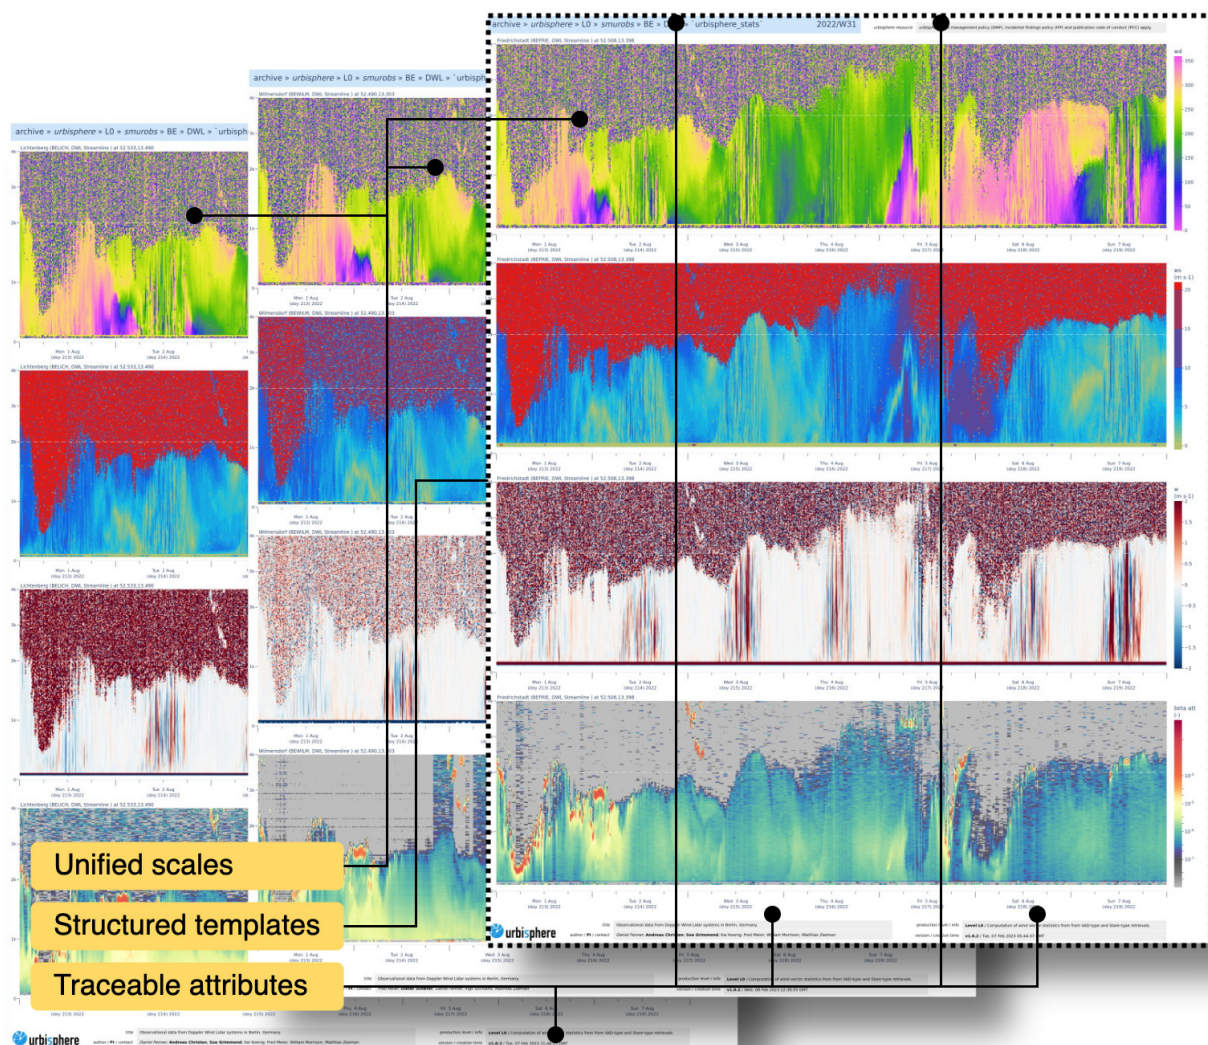

**Figure C5.** Near-time Doppler Wind Lidar (DWL) data used for diagnostics and data exploration.

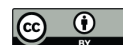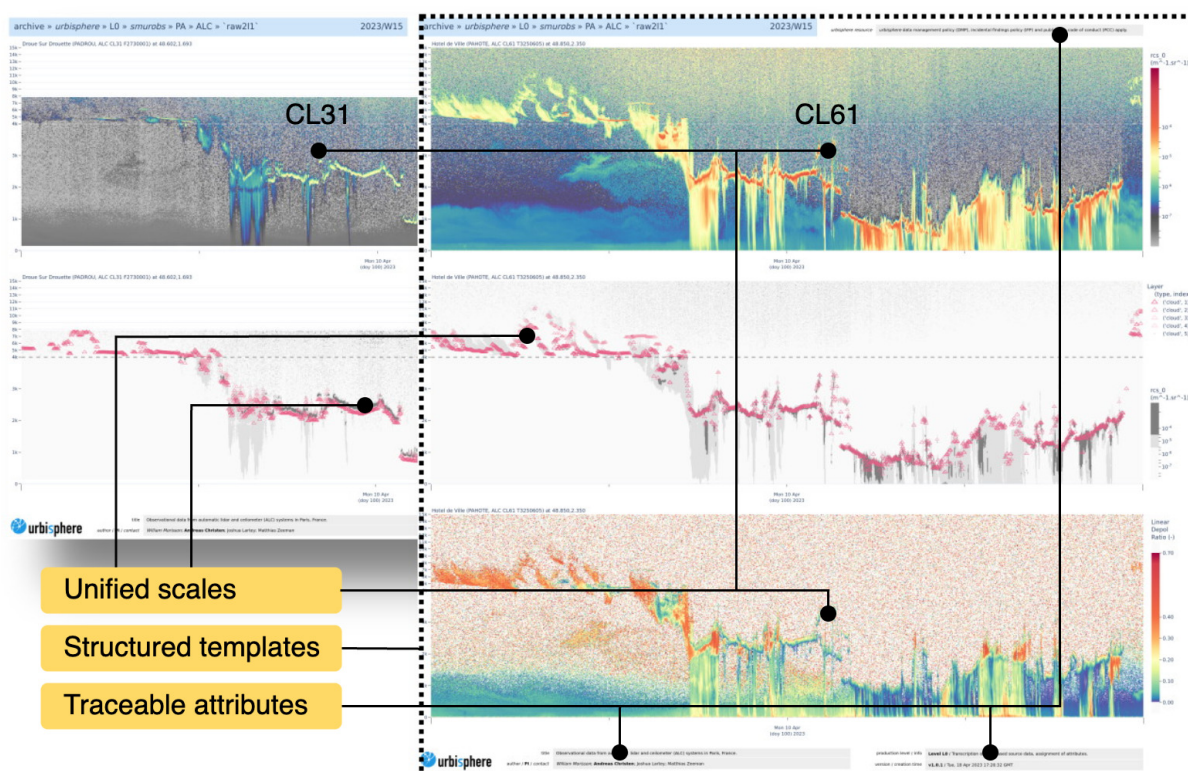

**Figure C6.** As Fig. C5, but for Automatic Lidar and Ceilometer (ALC)



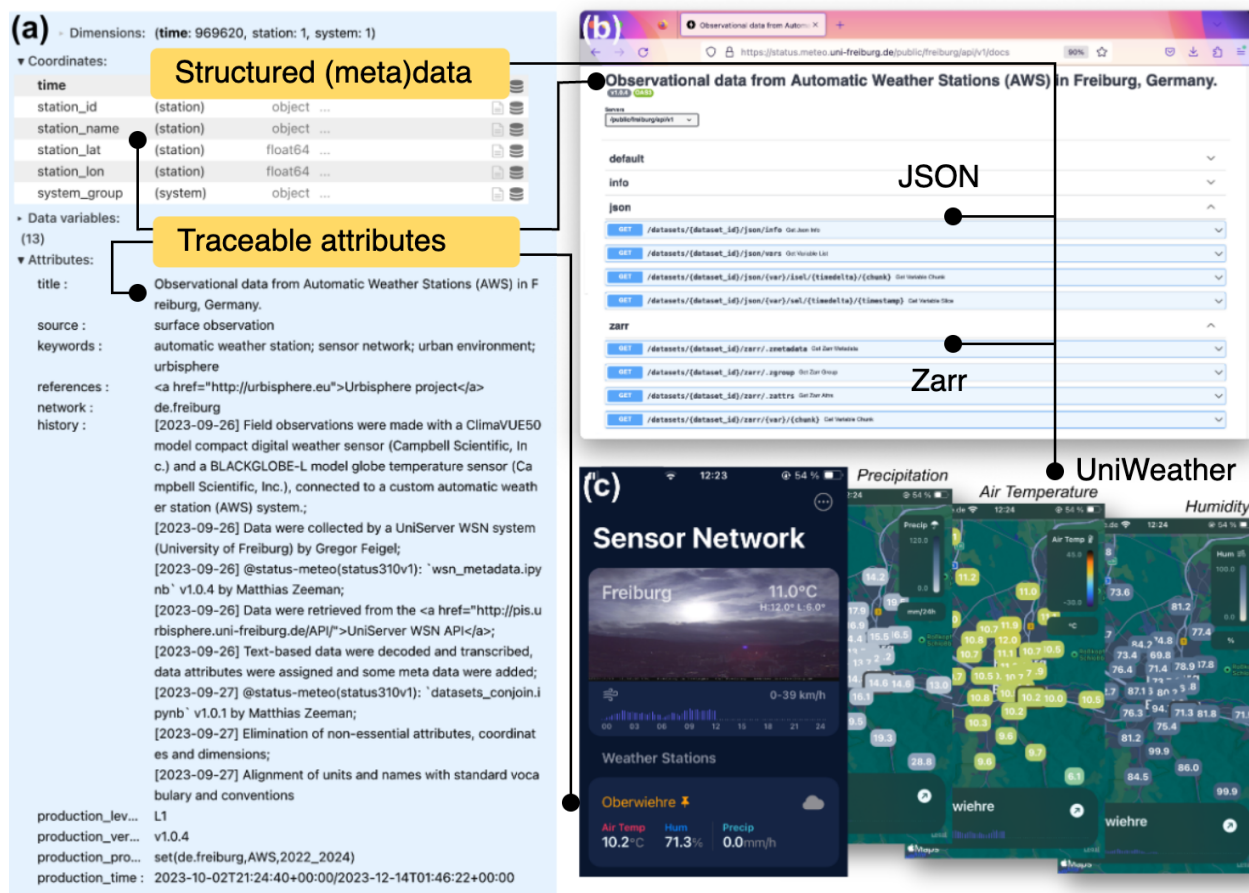

**Figure C7.** An example of (a) an AWS product summary (b) a data API and (c) the uniWeather Phone App (Feigel et al., in review) that use the same (meta-)data dynamically.



550 *Author contributions.* AC, SG and NC supervised the project; DF, WM, GF and MS performed investigation; MZ performed data management and computations; all authors contributed to the data system; MZ wrote the manuscript draft; AC, SG, NC, DF, WM and GF reviewed and edited the manuscript.

*Competing interests.* The authors declare that they have no conflict of interest.

*Acknowledgements.* This project has received funding from the European Research Council (ERC) under the European Union's Horizon  
555 2020 research and innovation programme (grant agreement No 855005). We thank Karthik Reddy Bushireddy Sri, Kai König, Joshua Lartey, Ferdinand Briegel, Rainer Hilland, Dana Looschelders, Joshua Hashemi, Dirk Schindler, Carlotta Gertsen, Olga Shevchenko, Marvin Plein, Dirk Redepenning, Benjamin Gebert, Jan Leendertse, Philipp Michels and Raphaël Pesché (all University Freiburg), Giorgos Somarakis (FORTH), Jörn Birkmann (University of Stuttgart), Swen Metzger (University Freiburg and Research Concepts Io GmbH), Kit Benjamin and Matthew Clements (both University of Reading), Fred Meier and Dieter Scherer (both Technische Universität Berlin), Martial Haeffelin  
560 (SIRTA), Marc-Antoine Drouin and Simone Kotthaus (both Ecole Polytechnique), Kai Fisher (Fraunhofer EMI), Gerold Hahn (Epitonion GmbH) and Dominik Froehlich (Stadt Freiburg) for assistance and helpful discussion.



## References

- Zenodo Community: urbisphere, <https://zenodo.org/communities/urbisphere/>, last access: 15 May 2024, 2021.
- Anaconda Software Distribution, <https://docs.anaconda.com/>, 2023.
- 565 Allwine, J., Leach, M., Stockham, L., Shinn, J., Hosker, R., Bowers, J., and Pace, J.: Overview of Joint Urban 2003: an atmospheric dispersion study in Oklahoma City, Symposium on Planning, Nowcasting, and Forecasting in the Urban Zone, Seattle, Washington, 2004.
- Baklanov, A., Grimmond, C., Carlson, D., Terblanche, D., Tang, X., Bouchet, V., Lee, B., Langendijk, G., Kolli, R., and Hovsepyan, A.: From urban meteorology, climate and environment research to integrated city services, *Urban Climate*, 23, 330–341, <https://doi.org/10.1016/j.uclim.2017.05.004>, 2018.
- 570 Barlow, J., Best, M., Bohnenstengel, S. I., Clark, P., Grimmond, S., Lean, H., Christen, A., Emeis, S., Haeffelin, M., Harman, I. N., Lemonsu, A., Martilli, A., Pardyjak, E., Rotach, M. W., Ballard, S., Boutle, I., Brown, A., Cai, X., Carpentieri, M., Coceal, O., Crawford, B., Di Sabatino, S., Dou, J., Drew, D. R., Edwards, J. M., Fallmann, J., Fortuniak, K., Gornall, J., Gronemeier, T., Halios, C. H., Hertwig, D., Hirano, K., Holtslag, A. A. M., Luo, Z., Mills, G., Nakayoshi, M., Pain, K., Schlünzen, K. H., Smith, S., Soulhac, L., Steeneveld, G.-J., Sun, T., Theeuwes, N. E., Thomson, D., Voogt, J. A., Ward, H. C., Xie, Z.-T., and Zhong, J.: Developing a Research Strategy to
- 575 Better Understand, Observe, and Simulate Urban Atmospheric Processes at Kilometer to Subkilometer Scales, *Bulletin of the American Meteorological Society*, 98, ES261–ES264, <https://doi.org/10.1175/bams-d-17-0106.1>, 2017.
- Bohnenstengel, S. I., Belcher, S. E., Aiken, A., Allan, J. D., Allen, G., Bacak, A., Bannan, T. J., Barlow, J. F., Beddows, D. C. S., Bloss, W. J., Booth, A. M., Chemel, C., Coceal, O., Di Marco, C. F., Dubey, M. K., Faloon, K. H., Fleming, Z. L., Furger, M., Gietl, J. K., Graves, R. R., Green, D. C., Grimmond, C. S. B., Halios, C. H., Hamilton, J. F., Harrison, R. M., Heal, M. R., Heard, D. E., Helfter, C., Herndon,
- 580 S. C., Holmes, R. E., Hopkins, J. R., Jones, A. M., Kelly, F. J., Kotthaus, S., Langford, B., Lee, J. D., Leigh, R. J., Lewis, A. C., Lidster, R. T., Lopez-Hilfiker, F. D., McQuaid, J. B., Mohr, C., Monks, P. S., Nemitz, E., Ng, N. L., Percival, C. J., Prévôt, A. S. H., Ricketts, H. M. A., Sokhi, R., Stone, D., Thornton, J. A., Tremper, A. H., Valach, A. C., Visser, S., Whalley, L. K., Williams, L. R., Xu, L., Young, D. E., and Zotter, P.: Meteorology, Air Quality, and Health in London: The ClearfLo Project, *Bulletin of the American Meteorological Society*, 96, 779–804, <https://doi.org/10.1175/bams-d-12-00245.1>, 2015.
- 585 Brett Schneider, P., Axtmann, A., Böker, E., and Von Suchodoletz, D.: Offene Lizenzen für Forschungsdaten, o-bib. Das offene Bibliotheksjournal / Herausgeber VDB, p. Bd. 8 Nr. 3 (2021), <https://doi.org/10.5282/O-BIB/5749>, 2021.
- Bundesamt für Kartographie und Geodäsie: European Vertical Reference System - EVRS, Online, <https://evrs.bkg.bund.de/Subsites/EVRS/EN/Home/home.html>, 2023.
- Caluwaerts, S., Top, S., Vergauwen, T., Wauters, G., Ridder, K. D., Hamdi, R., Mesuere, B., Schaeybroeck, B. V., Wouters, H., and Termonia,
- 590 P.: Engaging Schools to Explore Meteorological Observational Gaps, *Bulletin of the American Meteorological Society*, 102, E1126–E1132, <https://doi.org/10.1175/bams-d-20-0051.1>, 2021.
- Changnon, S. A., Huff, F. A., and Semonin, R. G.: METROMEX: an Investigation of Inadvertent Weather Modification, *Bulletin of the American Meteorological Society*, 52, 958–968, [https://doi.org/10.1175/1520-0477\(1971\)052<0958:maioiw>2.0.co;2](https://doi.org/10.1175/1520-0477(1971)052<0958:maioiw>2.0.co;2), 1971.
- Chrysoulakis, N., Ludlow, D., Mitraka, Z., Somarakis, G., Khan, Z., Lauwaet, D., Hooyberghs, H., Feliu, E., Navarro, D., Feigenwinter, C.,
- 595 Holsten, A., Soukup, T., Dohr, M., Marconcini, M., and Holt Andersen, B.: Copernicus for urban resilience in Europe, *Scientific Reports*, 13, <https://doi.org/10.1038/s41598-023-43371-9>, 2023.



- de Vos, L. W., Droste, A. M., Zander, M. J., Overeem, A., Leijnse, H., Heusinkveld, B. G., Steeneveld, G. J., and Uijlenhoet, R.: Hydrometeorological Monitoring Using Opportunistic Sensing Networks in the Amsterdam Metropolitan Area, *Bulletin of the American Meteorological Society*, 101, E167–E185, <https://doi.org/10.1175/bams-d-19-0091.1>, 2020.
- 600 European Organization For Nuclear Research and OpenAIRE: Zenodo, <https://doi.org/10.25495/7GXX-RD71>, 2013.
- Feigl, G., Plein, M., Zeeman, M., Metzger, S., Matzarakis, A., Schindler, D., and Christen, A.: High spatio-temporal and continuous monitoring of outdoor thermal comfort in urban areas: a generic and modular sensor network and outreach platform, *Sustainable Cities and Society*, in review.
- Fenner, D., Christen, A., Gertsen, C., Grimmond, S., König, K., Looschelders, D., Meier, F., Metzger, S., Mitraka, Z., Morrison, W., Tsirantonakis, D., and Zeeman, M.: Metadata for the urbisphere-Berlin campaign during 2021-2022: technical documentation, <https://doi.org/10.5281/ZENODO.10833089>, 2024a.
- 605 Fenner, D., Christen, A., Grimmond, S., Meier, F., Morrison, W., Zeeman, M., Barlow, J., Birkmann, J., Blunn, L., Chrysoulakis, N., Clements, M., Glazer, R., Hertwig, D., Kotthaus, S., König, K., Looschelders, D., Mitraka, Z., Poursanidis, D., Tsirantonakis, D., Bechtel, B., Benjamin, K., Beyrich, F., Briegel, F., Feigl, G., Gertsen, C., Iqbal, N., Kittner, J., Lean, H., Liu, Y., Luo, Z., McGrory, M., Metzger, S., Paskin, M., Ravan, M., Ruhtz, T., Saunders, B., Scherer, D., Smith, S. T., Stretton, M., Trachte, K., and Van Hove, M.: urbisphere-Berlin campaign: Investigating multi-scale urban impacts on the atmospheric boundary layer, *Bulletin of the American Meteorological Society*, p. in revision, 2024b.
- 610 Giles, D. M., Sinyuk, A., Sorokin, M. G., Schafer, J. S., Smirnov, A., Slutsker, I., Eck, T. F., Holben, B. N., Lewis, J. R., Campbell, J. R., Welton, E. J., Korkin, S. V., and Lyapustin, A. I.: Advancements in the Aerosol Robotic Network (AERONET) Version 3 database – automated near-real-time quality control algorithm with improved cloud screening for Sun photometer aerosol optical depth (AOD) measurements, *Atmospheric Measurement Techniques*, 12, 169–209, <https://doi.org/10.5194/amt-12-169-2019>, 2019.
- 615 Grimmond, C. S. B.: Progress in measuring and observing the urban atmosphere, *Theoretical and Applied Climatology*, 84, 3–22, <https://doi.org/10.1007/s00704-005-0140-5>, 2005.
- Grimmond, C. S. B., Blackett, M., Best, M. J., Barlow, J., Baik, J.-J., Belcher, S. E., Bohnenstengel, S. I., Calmet, I., Chen, F., Dandou, A., Fortuniak, K., Gouvea, M. L., Hamdi, R., Hendry, M., Kawai, T., Kawamoto, Y., Kondo, H., Kravynhoff, E. S., Lee, S.-H., Lorian, T., Martilli, A., Masson, V., Miao, S., Oleson, K., Pigeon, G., Porson, A., Ryu, Y.-H., Salamanca, F., Shashua-Bar, L., Steeneveld, G.-J., Tombrou, M., Voogt, J., Young, D., and Zhang, N.: The International Urban Energy Balance Models Comparison Project: First Results from Phase 1, *Journal of Applied Meteorology and Climatology*, 49, 1268–1292, <https://doi.org/10.1175/2010jamc2354.1>, 2010.
- 620 Grimmond, S., Bouchet, V., Molina, L. T., Baklanov, A., Tan, J., Schlünzen, K. H., Mills, G., Golding, B., Masson, V., Ren, C., Voogt, J., Miao, S., Lean, H., Heusinkveld, B., Hovespyan, A., Teruggi, G., Parrish, P., and Joe, P.: Integrated urban hydrometeorological, climate and environmental services: Concept, methodology and key messages, *Urban Climate*, 33, 100623, <https://doi.org/10.1016/j.uclim.2020.100623>, 2020.
- 625 Gubler, M., Christen, A., Remund, J., and Brönnimann, S.: Evaluation and application of a low-cost measurement network to study intra-urban temperature differences during summer 2018 in Bern, Switzerland, *Urban Climate*, 37, 100817, <https://doi.org/10.1016/j.uclim.2021.100817>, 2021.
- 630 Haeffelin, M., Kotthaus, S., Bastin, S., Bouffies-Cloch  , S., Cantrell, C., Christen, A., Dupont, J.-C., Foret, G., Gros, V., Lemonsu, A., Leymarie, J., Lohou, F., Madelin, M., Masson, V., Michoud, V., Price, J., Ramonet, M., Ribaud, J.-F., Sartelet, K., and Wurtz, J.: PANAME – Project synergy of atmospheric research in the Paris region, <https://doi.org/10.5194/egusphere-egu23-14781>, 2023.





- Hassell, D., Gregory, J., Blower, J., Lawrence, B. N., and Taylor, K. E.: A data model of the Climate and Forecast metadata conventions (CF-1.6) with a software implementation (cf-python v2.1), *Geoscientific Model Development*, 10, 4619–4646, <https://doi.org/10.5194/gmd-10-4619-2017>, 2017.
- Hertwig, D., McGrory, M., Paskin, M., Liu, Y., Lo Piano, S., Ramirez-Mendiola, J., Smith, T., and Grimmond, S.: Connecting physical and socio-economic spaces for urban modelling: a dataset for London, *Geoscience Data Journal*, in preparation.
- Jha, M., Marpu, P. R., Chau, C.-K., and Armstrong, P.: Design of sensor network for urban micro-climate monitoring, in: 2015 IEEE First International Smart Cities Conference (ISC2), IEEE, <https://doi.org/10.1109/isc2.2015.7366153>, 2015.
- Karl, T., Gohm, A., Rotach, M. W., Ward, H. C., Graus, M., Cede, A., Wohlfahrt, G., Hammerle, A., Haid, M., Tiefengraber, M., Lamprecht, C., Vergeiner, J., Kreuter, A., Wagner, J., and Staudinger, M.: Studying Urban Climate and Air Quality in the Alps: The Innsbruck Atmospheric Observatory, *Bulletin of the American Meteorological Society*, 101, E488–E507, <https://doi.org/10.1175/bams-d-19-0270.1>, 2020.
- Kayser, M., Päschke, E., Detring, C., Lehmann, V., Beyrich, F., and Leinweber, R.: Standardized Doppler lidar processing for operational use in a future network, <https://doi.org/10.5194/dach2022-209>, 2021.
- Kotthaus, S., Haeffelin, M., Drouin, M.-A., Dupont, J.-C., Grimmond, S., Haeefe, A., Hervo, M., Poltera, Y., and Wiegner, M.: Tailored Algorithms for the Detection of the Atmospheric Boundary Layer Height from Common Automatic Lidars and Ceilometers (ALC), *Remote Sensing*, 12, 3259, <https://doi.org/10.3390/rs12193259>, 2020.
- Landsberg, H. E.: Meteorological Observations in Urban Areas, pp. 91–99, American Meteorological Society, [https://doi.org/10.1007/978-1-935704-35-5\\_14](https://doi.org/10.1007/978-1-935704-35-5_14), 1970.
- Lipson, M., Grimmond, S., Best, M., Chow, W. T. L., Christen, A., Chrysoulakis, N., Coutts, A., Crawford, B., Earl, S., Evans, J., Fortuniak, K., Heusinkveld, B. G., Hong, J.-W., Hong, J., Järvi, L., Jo, S., Kim, Y.-H., Kotthaus, S., Lee, K., Masson, V., McFadden, J. P., Michels, O., Pawlak, W., Roth, M., Sugawara, H., Tapper, N., Velasco, E., and Ward, H. C.: Harmonized gap-filled datasets from 20 urban flux tower sites, *Earth System Science Data*, 14, 5157–5178, <https://doi.org/10.5194/essd-14-5157-2022>, 2022.
- Liu, Y., Luo, Z., and Grimmond, S.: Impact of building envelope design parameters on diurnal building anthropogenic heat emission, *Building and Environment*, 234, 110 134, <https://doi.org/10.1016/j.buildenv.2023.110134>, 2023.
- Manninen, A. J., Marke, T., Tuononen, M., and O'Connor, E. J.: Atmospheric Boundary Layer Classification With Doppler Lidar, *Journal of Geophysical Research: Atmospheres*, 123, 8172–8189, <https://doi.org/10.1029/2017jd028169>, 2018.
- Marquès, E., Masson, V., Naveau, P., Mestre, O., Dubreuil, V., and Richard, Y.: Urban Heat Island Estimation from Crowdsensing Thermometers Embedded in Personal Cars, *Bulletin of the American Meteorological Society*, 103, E1098–E1113, <https://doi.org/10.1175/bams-d-21-0174.1>, 2022.
- Masson, V., Lemonsu, A., Hidalgo, J., and Voogt, J.: Urban Climates and Climate Change, *Annual Review of Environment and Resources*, 45, 411–444, <https://doi.org/10.1146/annurev-environ-012320-083623>, 2020.
- Mestayer, P. G., Durand, P., Augustin, P., Bastin, S., Bonnefond, J. M., Bénech, B., Campistron, B., Coppalle, A., Delbarre, H., Dousset, B., Drobinski, P., Druilhet, A., Fréjafon, E., Grimmond, C. S. B., Groleau, D., Irvine, M., Kergomard, C., Kermadi, S., Lagouarde, J. P., Lemonsu, A., Lohou, F., Long, N., Masson, V., Moppert, C., Noilhan, J., Offerle, B., Oke, T. R., Pigeon, G., Puygrenier, V., Roberts, S., Rosant, J. M., Sanid, F., Salmond, J., Talbaut, M., and Voogt, J.: The urban boundary-layer field campaign in marseille (ubl/clu-escompte): set-up and first results, *Boundary-Layer Meteorology*, 114, 315–365, <https://doi.org/10.1007/s10546-004-9241-4>, 2005.
- Middel, A., Nazarian, N., Demuzere, M., and Bechtel, B.: Urban Climate Informatics: An Emerging Research Field, *Frontiers in Environmental Science*, 10, <https://doi.org/10.3389/fenvs.2022.867434>, 2022.

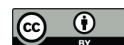

- Morrison, W.: sync-obs, <https://github.com/willmorrison1/sync-obs>, 2022.
- Muller, C. L., Chapman, L., Grimmond, C., Young, D. T., and Cai, X.-M.: Toward a Standardized Metadata Protocol for Urban Meteorological Networks, *Bulletin of the American Meteorological Society*, 94, 1161–1185, <https://doi.org/10.1175/bams-d-12-00096.1>, 2013a.
- 675 Muller, C. L., Chapman, L., Grimmond, C. S. B., Young, D. T., and Cai, X.: Sensors and the city: a review of urban meteorological networks, *International Journal of Climatology*, 33, 1585–1600, <https://doi.org/10.1002/joc.3678>, 2013b.
- NumFOCUS: Numerical Foundation for Open Code and Useable Science, online, <https://numfocus.org/sponsored-projects>.
- Oke, T. R.: Towards better scientific communication in urban climate, *Theoretical and Applied Climatology*, 84, 179–190, <https://doi.org/10.1007/s00704-005-0153-0>, 2005.
- 680 Oke, T. R.: *Urban climates*, Cambridge University Press, Cambridge, includes bibliographical references and index, 2017.
- Pardiyak, E. R. and Stoll, R.: Improving measurement technology for the design of sustainable cities, *Measurement Science and Technology*, 28, 092 001, <https://doi.org/10.1088/1361-6501/aa7c77>, 2017.
- Rettberg, N.: Zenodo Launches!, <https://www.openaire.eu/zenodo-is-launched>, 2018.
- Richard, Y., Emery, J., Dudek, J., Pergaud, J., Chateau-Smith, C., Zito, S., Rega, M., Vaire, T., Castel, T., Thévenin, T., and Pohl, B.: How
- 685 relevant are local climate zones and urban climate zones for urban climate research? Dijon (France) as a case study, *Urban Climate*, 26, 258–274, <https://doi.org/10.1016/j.uclim.2018.10.002>, 2018.
- Richardson, A. D., Hufkens, K., Milliman, T., Aubrecht, D. M., Chen, M., Gray, J. M., Johnston, M. R., Keenan, T. F., Klosterman, S. T., Kosmala, M., Melaas, E. K., Friedl, M. A., and Froelking, S.: Tracking vegetation phenology across diverse North American biomes using PhenoCam imagery, *Scientific Data*, 5, <https://doi.org/10.1038/sdata.2018.28>, 2018.
- 690 Rotach, M. W., Vogt, R., Bernhofer, C., Batchvarova, E., Christen, A., Clappier, A., Feddersen, B., Gryning, S.-E., Martucci, G., Mayer, H., Mitev, V., Oke, T. R., Parlow, E., Richner, H., Roth, M., Roulet, Y.-A., Ruffieux, D., Salmond, J. A., Schatzmann, M., and Voogt, J. A.: BUBBLE – an Urban Boundary Layer Meteorology Project, *Theoretical and Applied Climatology*, 81, 231–261, <https://doi.org/10.1007/s00704-004-0117-9>, 2005.
- Scherer, D., Antretter, F., Bender, S., Cortekar, J., Emeis, S., Fehrenbach, U., Gross, G., Halbig, G., Hasse, J., Maronga, B., Raasch, S., and
- 695 Scherber, K.: Urban Climate Under Change [UC]2 – A National Research Programme for Developing a Building-Resolving Atmospheric Model for Entire City Regions, *Meteorologische Zeitschrift*, 28, 95–104, <https://doi.org/10.1127/metz/2019/0913>, 2019.
- Scherer, D., Fehrenbach, U., Grassmann, T., Holtmann, A., Meier, F., Scherber, K., Pavlik, D., Höhne, T., Kanani-Sühring, F., Maronga, B., Ament, F., Banzhaf, S., Langer, I., Halbig, G., Kohler, M., Queck, R., Stratbücker, S., Winkler, M., Wegener, R., and Zeeman, M.: [UC]2 Data Standard "Urban Climate under Change", Online, [https://uc2-program.org/sites/default/files/inline-files/uc2\\_data\\_standard\\_0.pdf](https://uc2-program.org/sites/default/files/inline-files/uc2_data_standard_0.pdf),
- 700 version 1.5.2, 2022.
- Stewart, I. D.: A systematic review and scientific critique of methodology in modern urban heat island literature, *International Journal of Climatology*, 31, 200–217, <https://doi.org/10.1002/joc.2141>, 2011.
- Sulzer, M., Christen, A., and Matzarakis, A.: A Low-Cost Sensor Network for Real-Time Thermal Stress Monitoring and Communication in Occupational Contexts, *Sensors*, 22, 1828, <https://doi.org/10.3390/s22051828>, 2022.
- 705 Sulzer, M., Christen, A., and Matzarakis, A.: Predicting indoor air temperature and thermal comfort in occupational settings using weather forecasts, indoor sensors, and artificial neural networks, *Building and Environment*, 234, 110077, <https://doi.org/10.1016/j.buildenv.2023.110077>, 2023.
- Teschke, G. and Lehmann, V.: Mean wind vector estimation using the velocity–azimuth display (VAD) method: an explicit algebraic solution, *Atmospheric Measurement Techniques*, 10, 3265–3271, <https://doi.org/10.5194/amt-10-3265-2017>, 2017.



- 710 Vakkari, V., Manninen, A. J., O'Connor, E. J., Schween, J. H., van Zyl, P. G., and Marinou, E.: A novel post-processing algorithm for Halo Doppler lidars, *Atmospheric Measurement Techniques*, 12, 839–852, <https://doi.org/10.5194/amt-12-839-2019>, 2019.
- VDI: Environmental meteorology - Meteorological measurements - Fundamentals, in: VDI-Richtlinien, vol. Part 1 of *VDI 3786*, Beuth Verlag, Berlin, 2013.
- Walikewitz, N., Jänicke, B., Langner, M., and Endlicher, W.: Assessment of indoor heat stress variability in summer and during heat warnings: a case study using the UTCI in Berlin, Germany, *International Journal of Biometeorology*, 62, 29–42, <https://doi.org/10.1007/s00484-015-1066-y>, 2015.
- 715 Wilkinson, M. D., Dumontier, M., Aalbersberg, I. J., Appleton, G., Axton, M., Baak, A., Blomberg, N., Boiten, J.-W., da Silva Santos, L. B., Bourne, P. E., Bouwman, J., Brookes, A. J., Clark, T., Crosas, M., Dillo, I., Dumon, O., Edmunds, S., Evelo, C. T., Finkers, R., Gonzalez-Beltran, A., Gray, A. J., Groth, P., Goble, C., Grethe, J. S., Heringa, J., 't Hoen, P. A., Hooft, R., Kuhn, T., Kok, R., Kok, J., Lusher, S. J., Martone, M. E., Mons, A., Packer, A. L., Persson, B., Rocca-Serra, P., Roos, M., van Schaik, R., Sansone, S.-A., Schultes, E., Sengstag, T., Slater, T., Strawn, G., Swertz, M. A., Thompson, M., van der Lei, J., van Mulligen, E., Velterop, J., Waagmeester, A., Wittenburg, P., Wolstencroft, K., Zhao, J., and Mons, B.: The FAIR Guiding Principles for scientific data management and stewardship, *Scientific Data*, 3, <https://doi.org/10.1038/sdata.2016.18>, 2016.
- 720 WMO: Initial Guidance to Obtain Representative Meteorological Observations at Urban Sites, in: WMO-No. 1250, edited by Oke, T. R., Instruments and Observing Methods, p. 51, World Meteorological Organisation, [https://library.wmo.int/doc\\_num.php?explnum\\_id=9286](https://library.wmo.int/doc_num.php?explnum_id=9286), 2006.
- WMO: Guidance on Integrated Urban Hydrometeorological, Climate and Environment Services - Volume I: Concept and Methodology, in: WMO-No. 1234, edited by Grimmond, S., Bouchet, V., Molina, L., Baklanov, A., and Joe, P., Weather Climate Water, World Meteorological Organisation, [https://library.wmo.int/doc\\_num.php?explnum\\_id=11537](https://library.wmo.int/doc_num.php?explnum_id=11537), 2019.
- 730 WMO: Guidance on Integrated Urban Hydrometeorological, Climate and Environment Services - Volume II: Demonstration Cities, in: WMO-No. 1234, edited by Grimmond, S. and Sokhi, R., Weather Climate Water, World Meteorological Organisation, [https://library.wmo.int/doc\\_num.php?explnum\\_id=11537](https://library.wmo.int/doc_num.php?explnum_id=11537), 2021.
- WMO: Guidance on Measuring, Modelling and Monitoring the Canopy Layer Urban Heat Island (CL-UHI), in: WMO-No. 1292, edited by Schlünzen, K. H., Grimmond, S., and Baklanov, A., Weather Climate Water, p. 88, World Meteorological Organisation, [https://library.wmo.int/doc\\_num.php?explnum\\_id=11537](https://library.wmo.int/doc_num.php?explnum_id=11537), 2023.
- 735 Wood, C. R., Järvi, L., Kouznetsov, R. D., Nordbo, A., Joffe, S., Drebs, A., Vihma, T., Hirsikko, A., Suomi, I., Fortelius, C., O'Connor, E., Moiseev, D., Haapanala, S., Moilanen, J., Kangas, M., Karppinen, A., Vesala, T., and Kukkonen, J.: An Overview of the Urban Boundary Layer Atmosphere Network in Helsinki, *Bulletin of the American Meteorological Society*, 94, 1675–1690, <https://doi.org/10.1175/bams-d-12-00146.1>, 2013.
- 740 Yang, J. and Bou-Zeid, E.: Designing sensor networks to resolve spatio-temporal urban temperature variations: fixed, mobile or hybrid?, *Environmental Research Letters*, 14, 074 022, <https://doi.org/10.1088/1748-9326/ab25f8>, 2019.
- Zeeman, M., Holst, C. C., Kossmann, M., Leukauf, D., Munkel, C., Philipp, A., Rinke, R., and Emeis, S.: Urban Atmospheric Boundary-Layer Structure in Complex Topography: An Empirical 3D Case Study for Stuttgart, Germany, *Frontiers in Earth Science*, 10, <https://doi.org/10.3389/feart.2022.840112>, 2022.
